# Supplementary material for: Immune cell atlas of cholangiocarcinomas reveals distinct tumor microenvironments and associated prognoses
Source: PubMed Central journal article supplement (PMC8962046; doi:10.1186/s13045-022-01253-z), 2022-03-28
Supplement: 13045_2022_1253_MOESM1_ESM.pdf [file 13045_2022_1253_MOESM1_ESM.pdf]

# Supplementary Figures

**A**

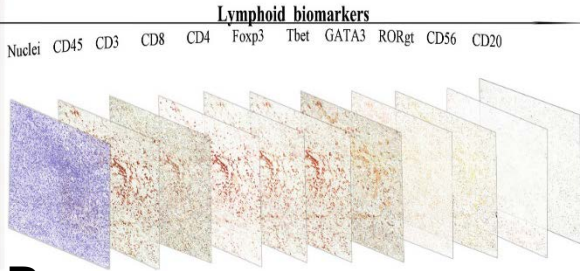

**B**

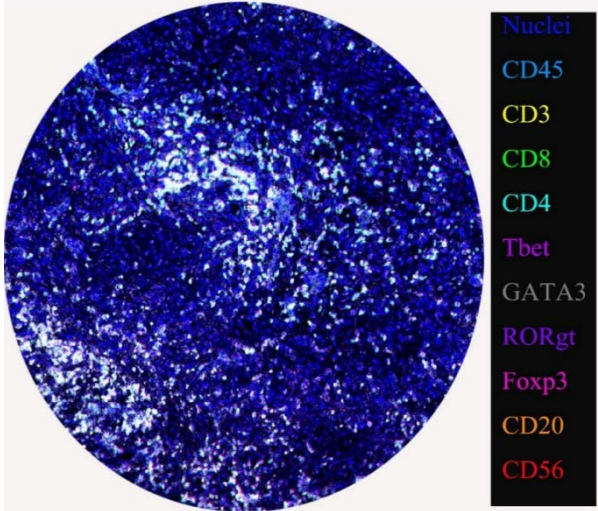

**C**

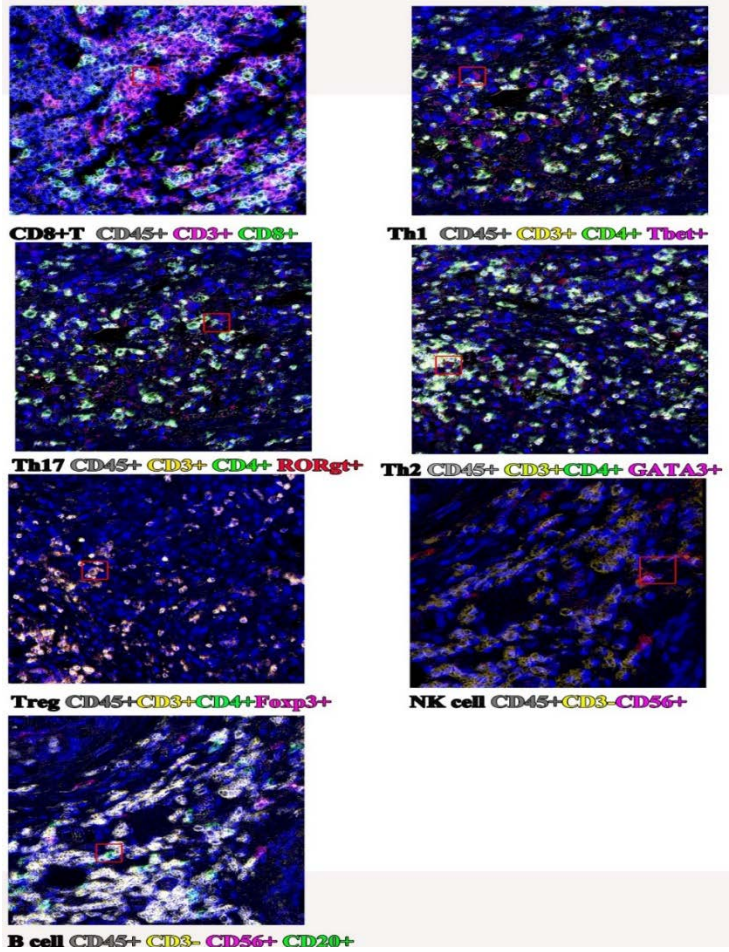

**D**

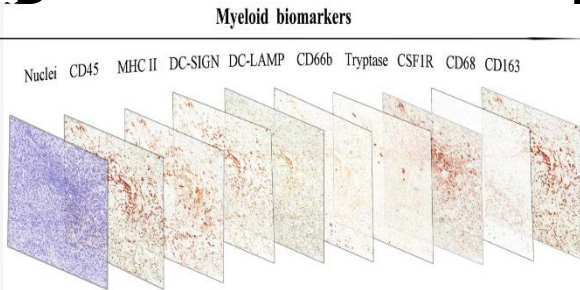

**F**

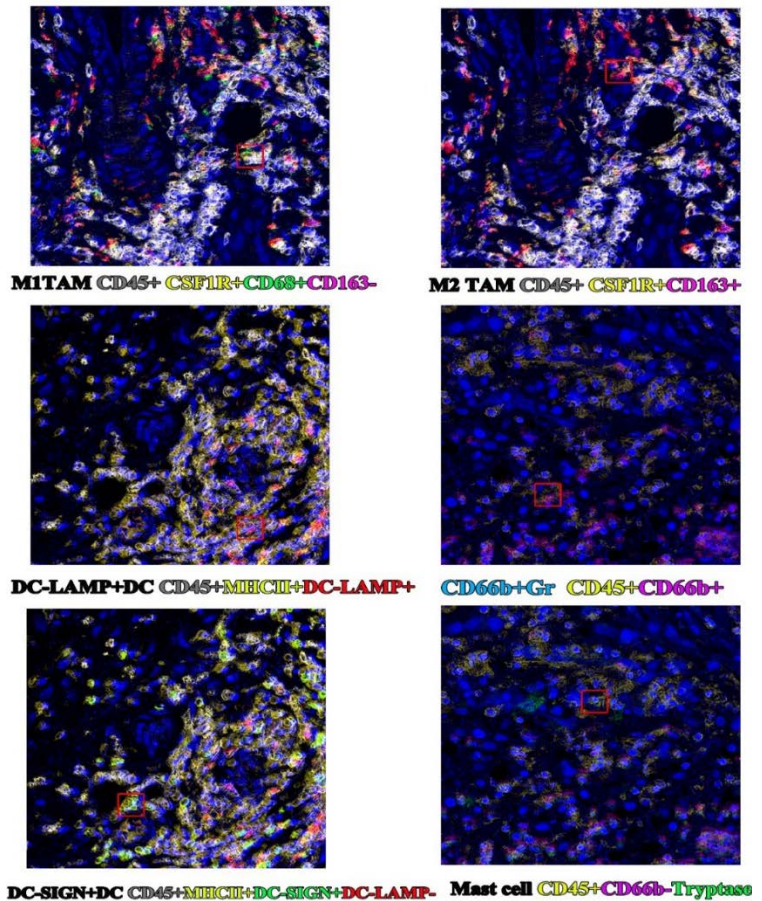

**E**

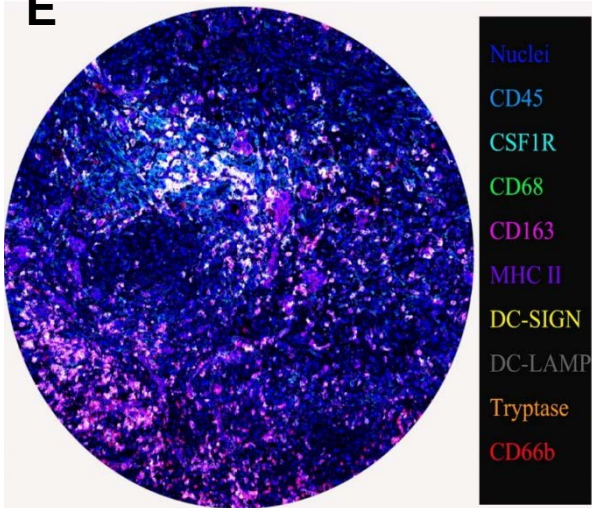

**Figure S1 The working flow of multiplex immunohistochemistry staining with a lymphoid cell panel and a myeloid cell panel.** A. Sequential staining and stripping of a series of immunohistochemistry staining with a panel of lymphoid cell markers. B. Overlaid multiple images stained with lymphoid cell markers with pseudocolors. C. Selected immune cell subtypes defined by multiple lymphoid cell markers. D. Sequential staining and stripping of a series of immunohistochemistry staining with a panel of myeloid cell markers. E. Overlaid multiple images stained with myeloid cell markers with pseudocolors. F. Selected immune cell subtypes defined by multiple myeloid cell markers.

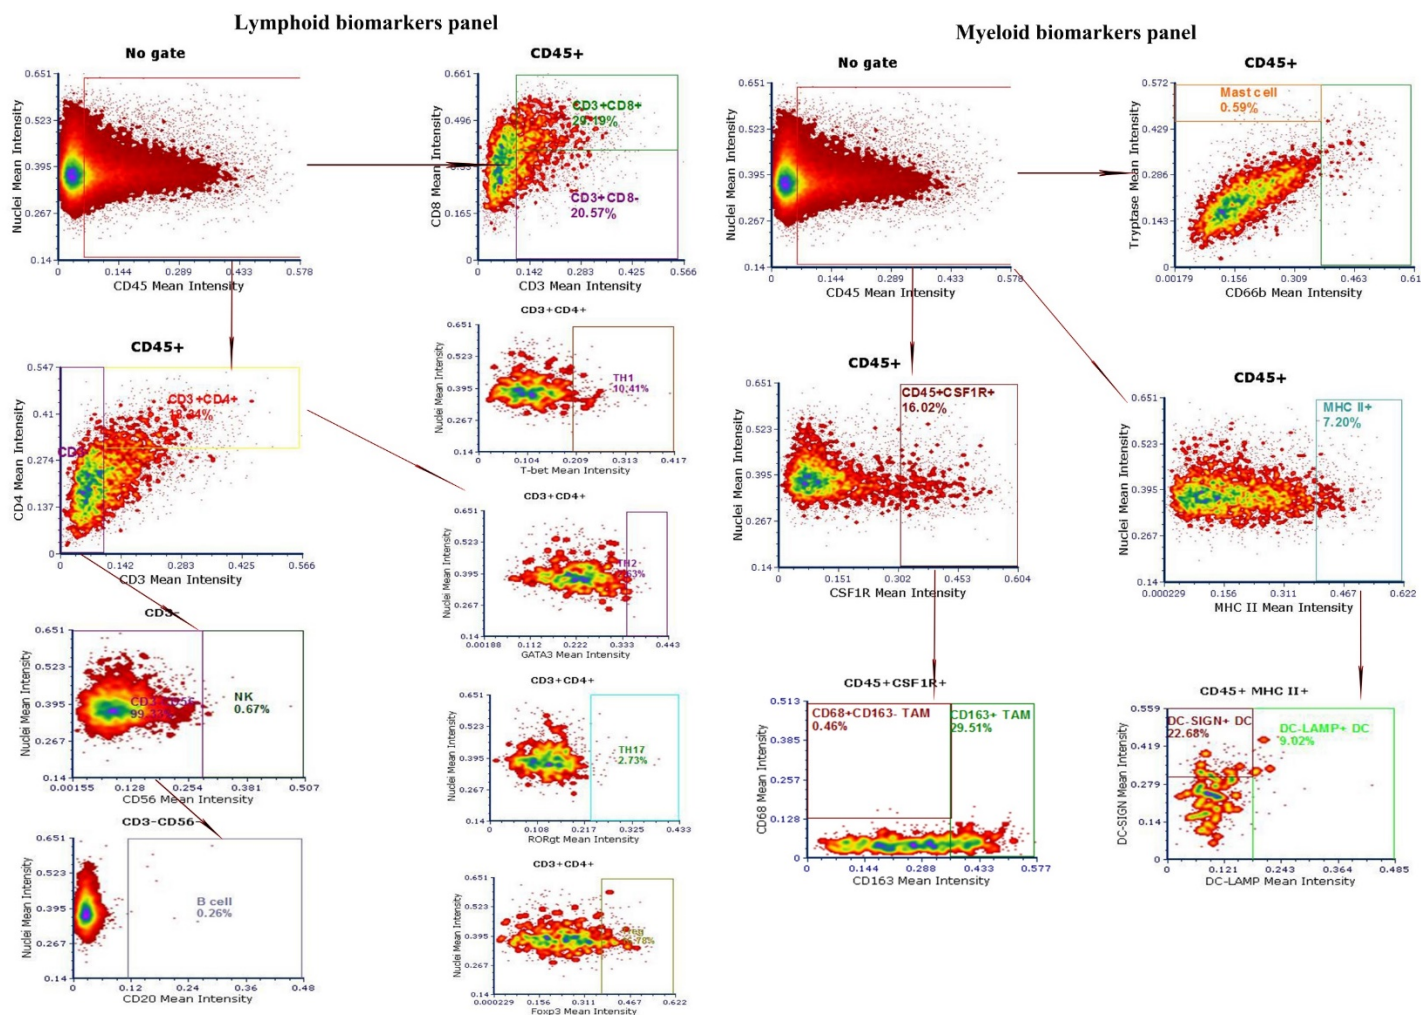

**Figure S2 Representative gating information in the imaging cytometry analysis of quantified multiplex immunohistochemistry staining signals.**

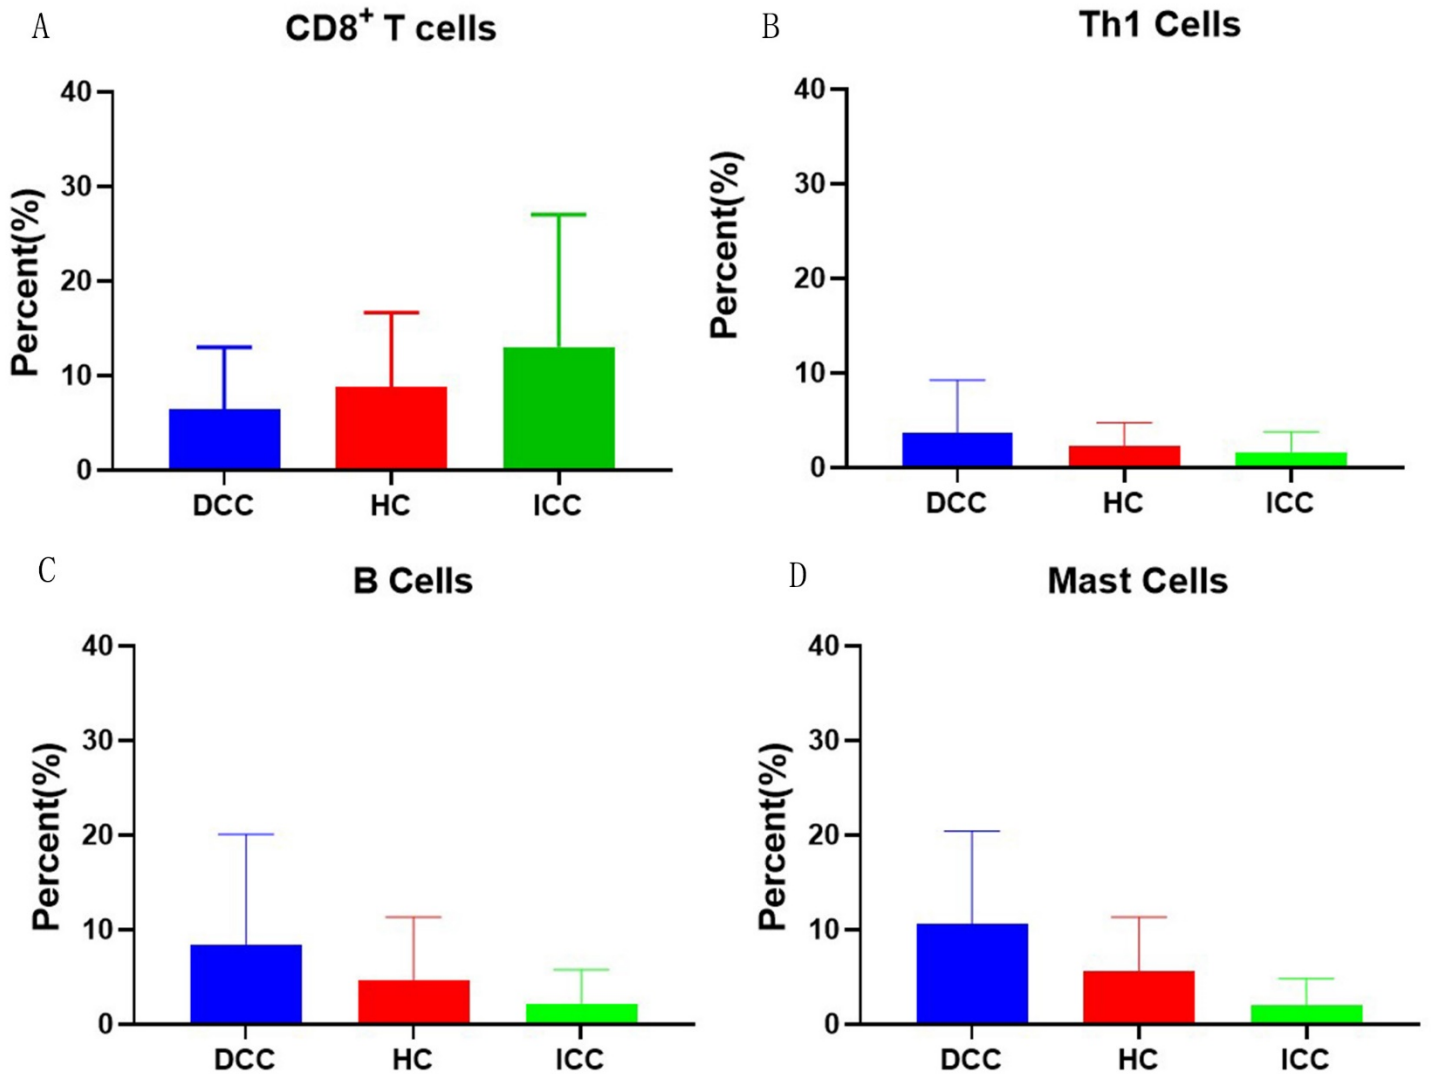

**Figure S3 Percentages of immune cell subtypes among CD45<sup>+</sup> cells.** Statistically significant difference in the density of CD8<sup>+</sup> cells, Th1 cells, B cells, and mast cells comparing between any two of three cholangiocarcinoma subtypes (all  $p < 0.05$ ). DCC, distal cholangiocarcinoma; HC, hilar cholangiocarcinoma; ICC, intrahepatic cholangiocarcinoma.

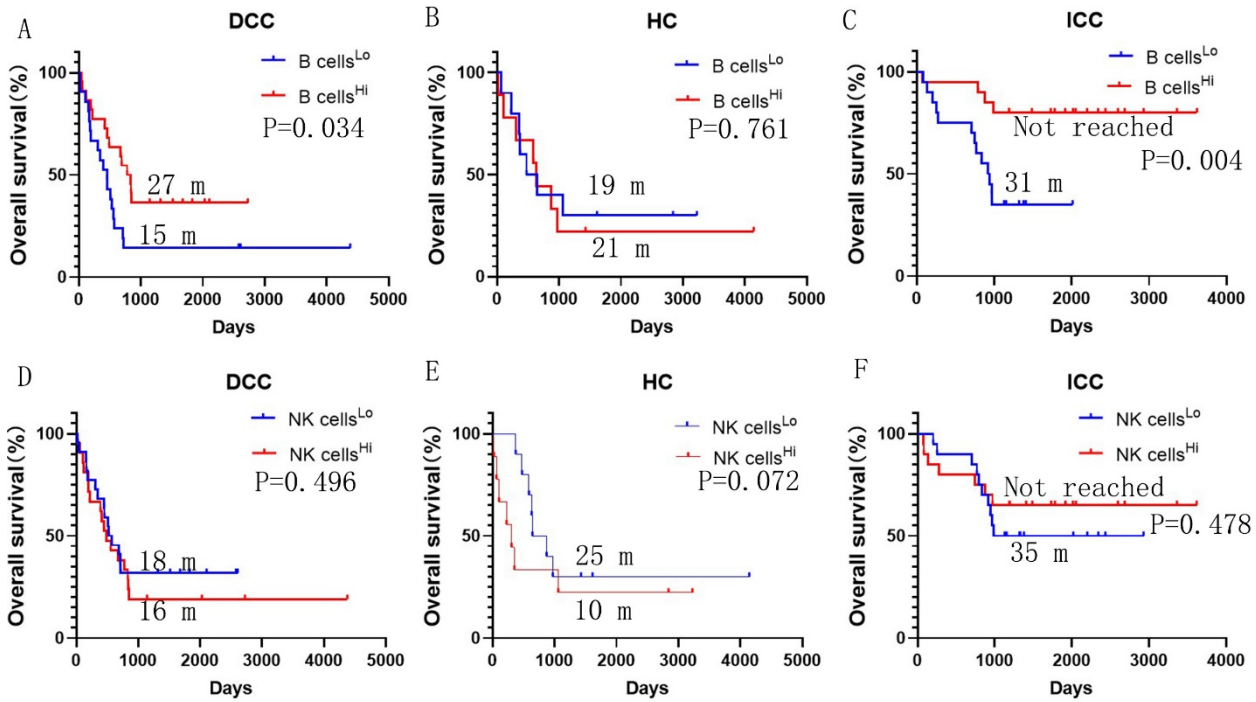

**Figure S4 Kaplan-Meier curves of overall survival of patients whose tumors are grouped by higher density vs. lower density of B cells and NK cells as indicated.** DCC, distal cholangiocarcinoma; HC, hilar cholangiocarcinoma; ICC, intrahepatic cholangiocarcinoma.

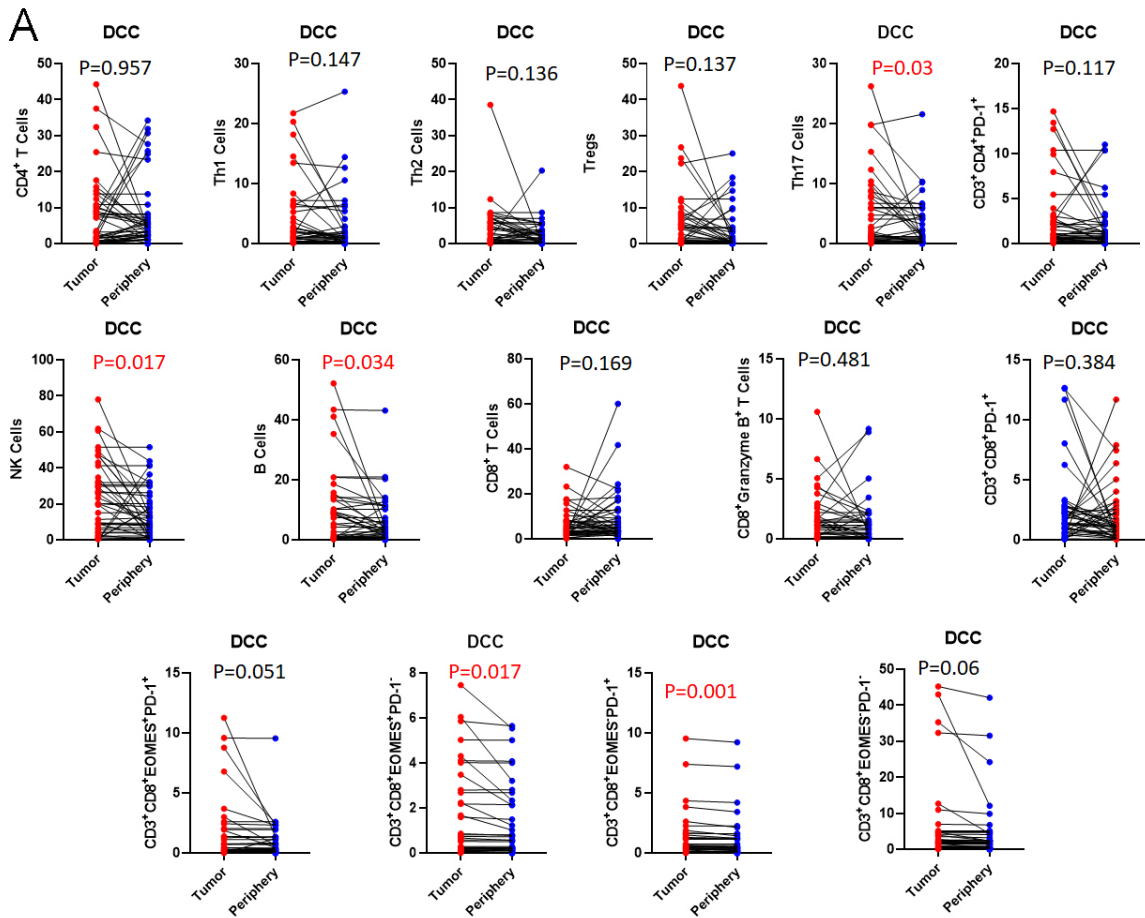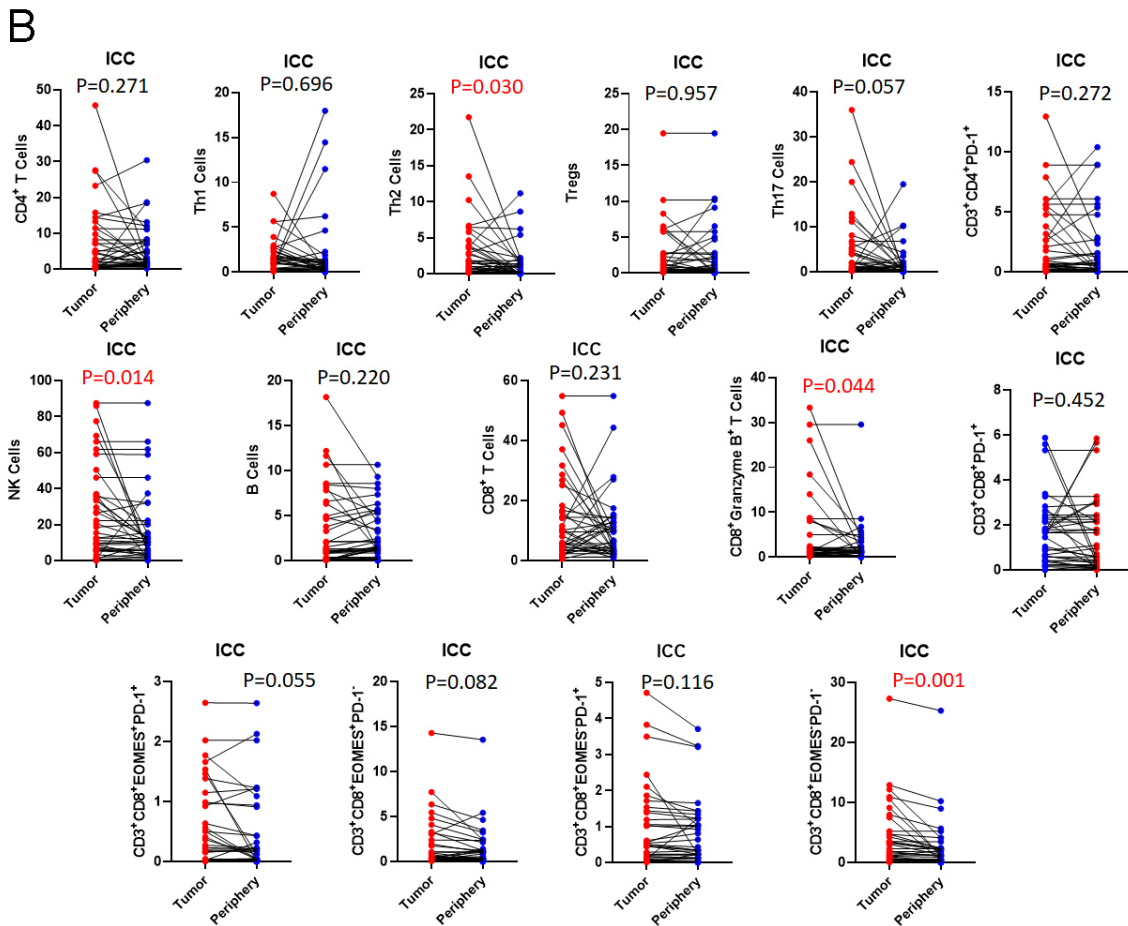

**Figure S5 Comparison of lymphocyte infiltrations in the tumor area vs. the periphery.** The tumor areas and the peripheries of tumors circled under pathologist guidance. The densities of various T cell subtypes, B cells, and NK cells as indicated were compared between tumor areas and peripheries of tumors. Paired t tests were done. Tumor areas and peripheries on the same cases were connected by a line. **A.** DCC, distal cholangiocarcinoma; **B.** ICC, intrahepatic cholangiocarcinoma.

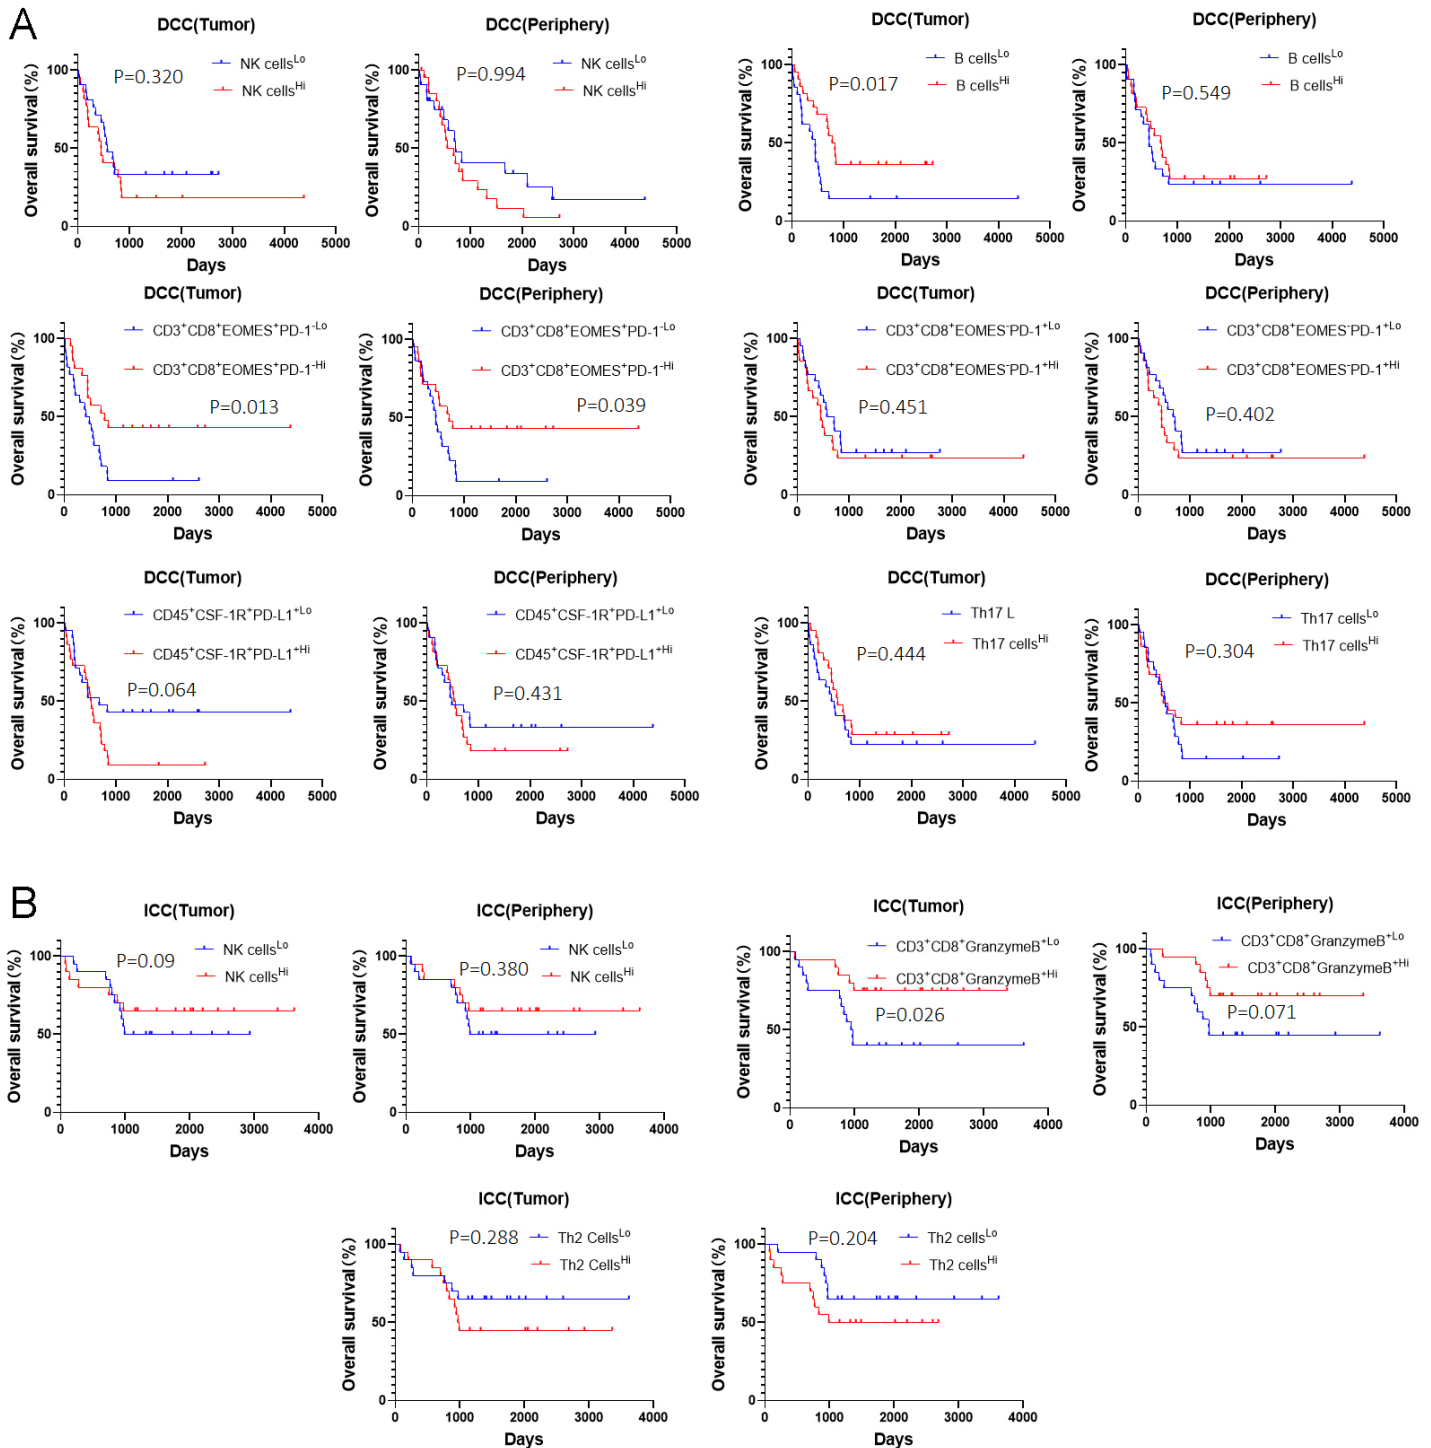

**Figure S6 Kaplan-Meier curves of overall survival of patients whose tumors are grouped by higher density vs. lower density of various T cell subtypes, B cells and NK cells as indicated in the tumor areas and in the peripheries of the tumors, respectively.** The survival correlation of those immune cell subtypes that showed significant difference in the filtration between the tumor areas and the peripheries of the tumors was analyzed here. **A.** DCC, distal cholangiocarcinoma; **B.** ICC, intrahepatic cholangiocarcinoma.



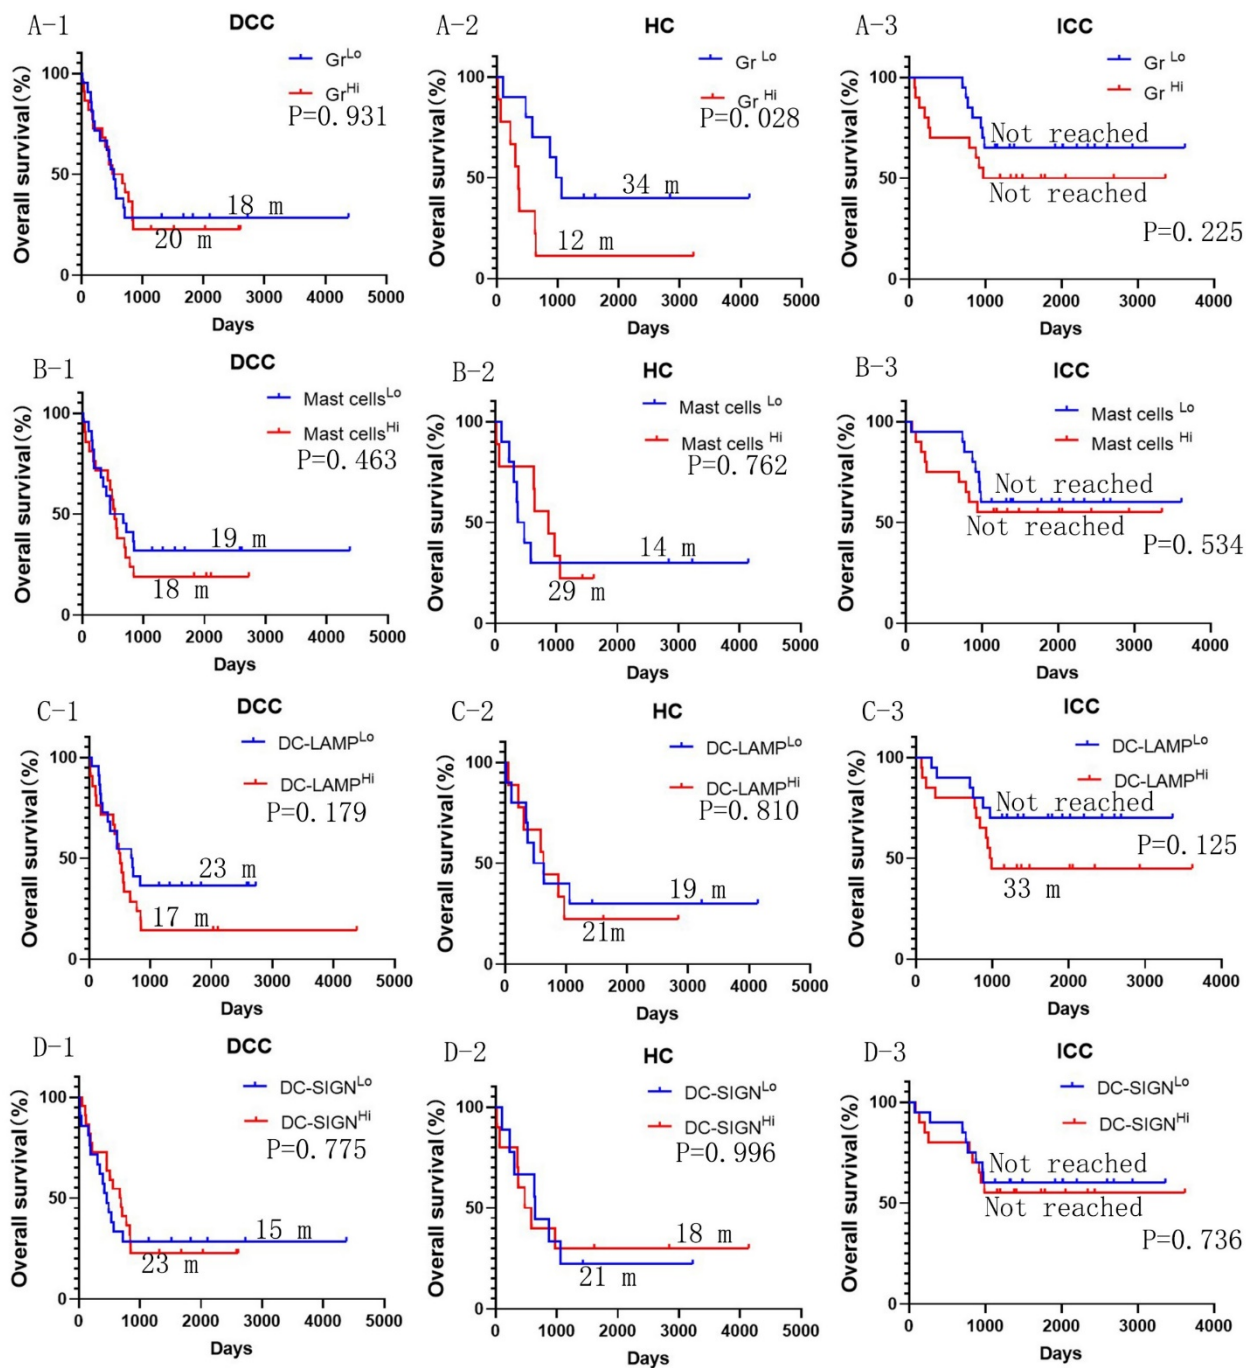

**Figure S7 Kaplan-Meier curves of overall survival of patients whose tumors are grouped by higher density vs. lower density of myeloid cell subtypes as indicated. Log rank tests were done with p values indicated. DCC, distal cholangiocarcinoma; HC, hilar cholangiocarcinoma; ICC, intrahepatic cholangiocarcinoma.**

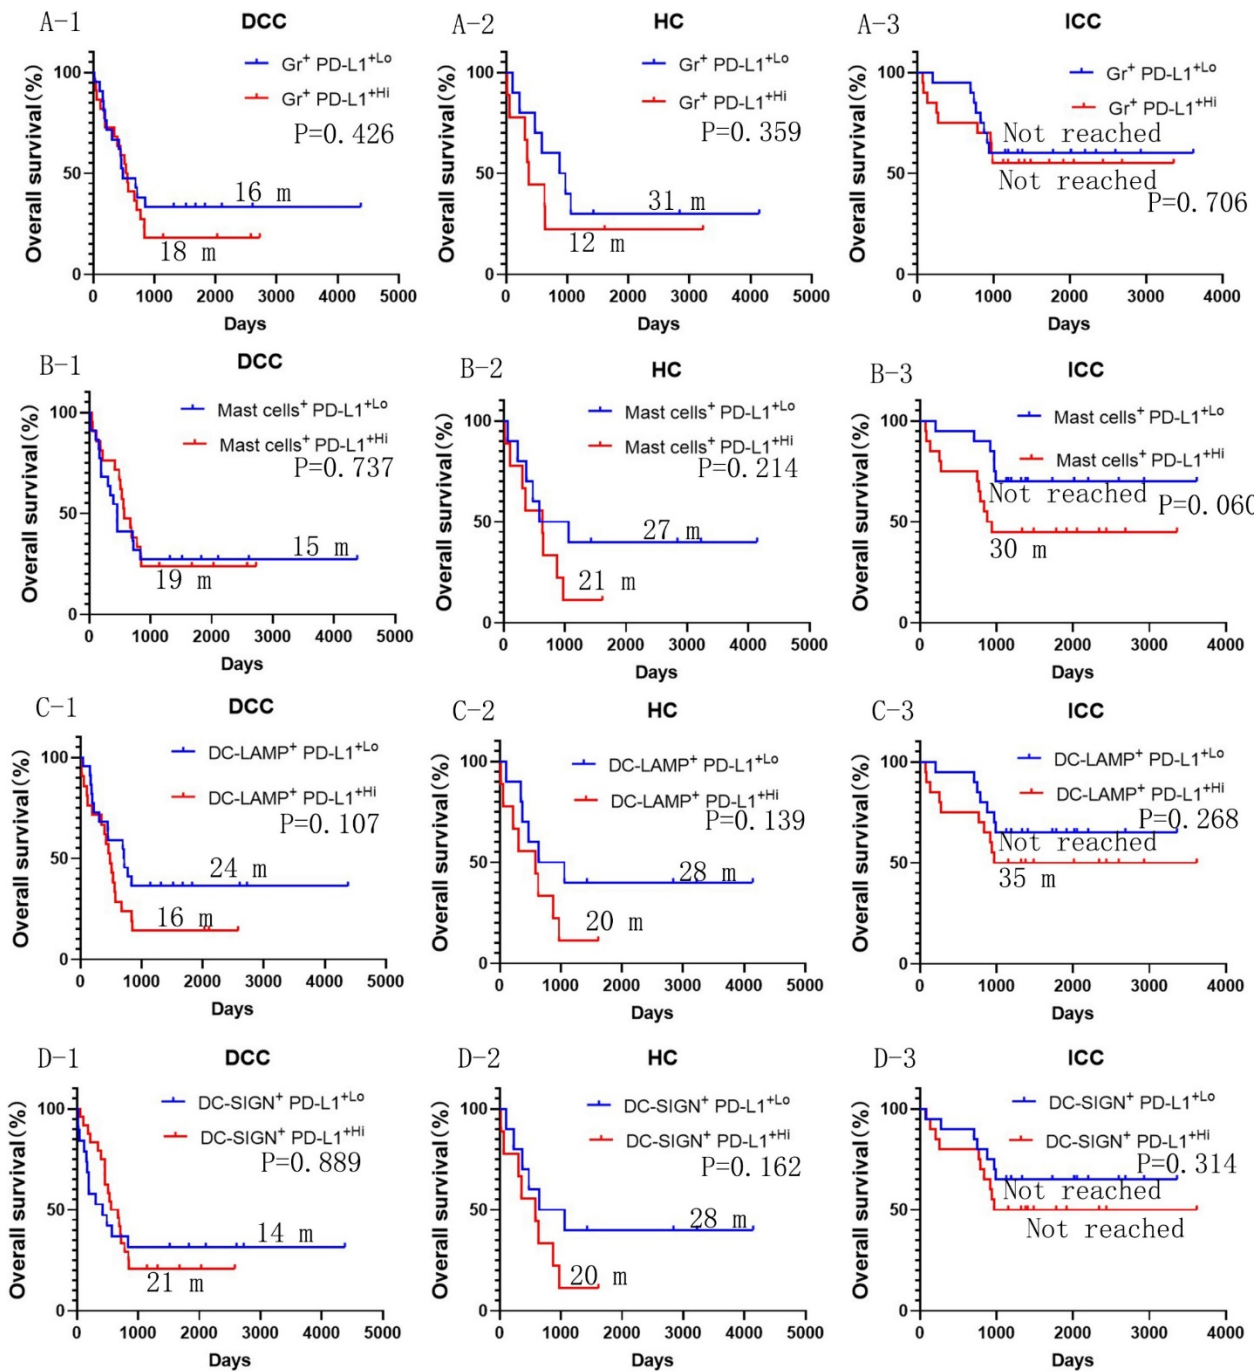

**Figure S8 Kaplan-Meier curves of overall survival of patients whose tumors are grouped by higher density vs. lower density of PD-L1+ myeloid cell subtypes as indicated.** Log rank tests were done with p values indicated. DCC, distal cholangiocarcinoma; HC, hilar cholangiocarcinoma; ICC, intrahepatic cholangiocarcinoma.

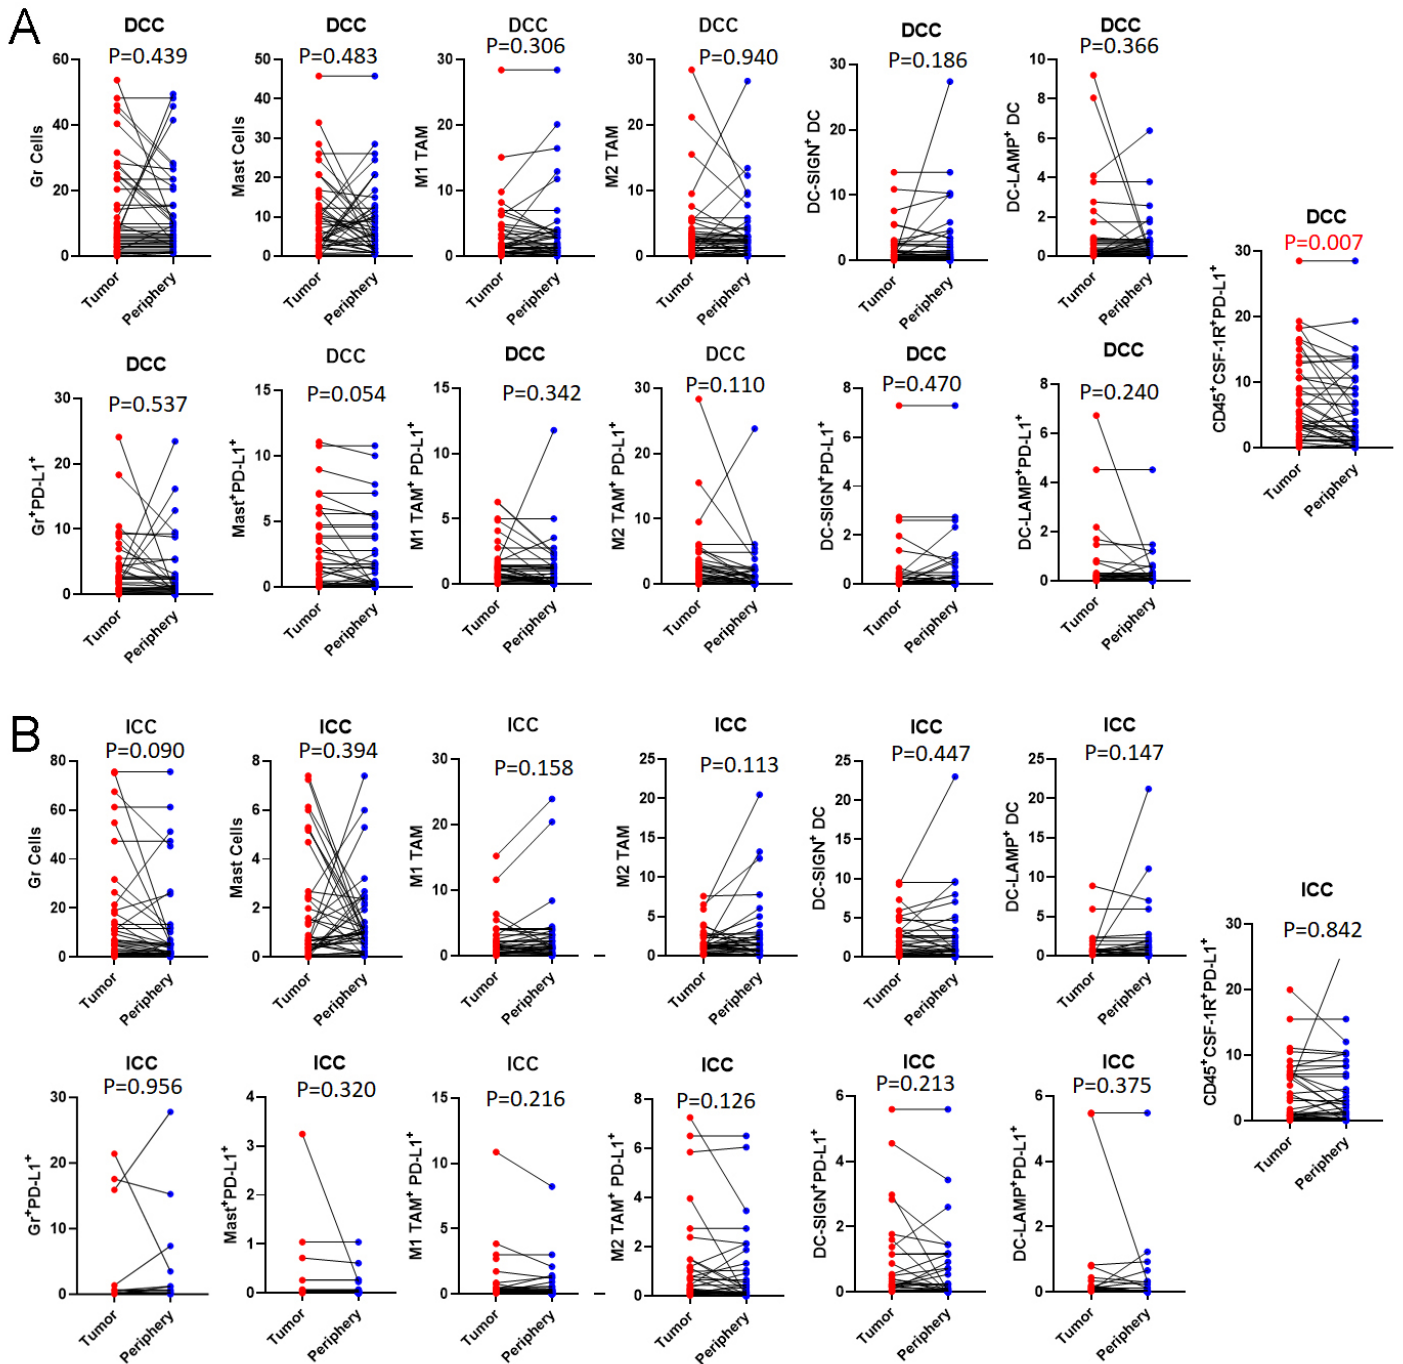

**Figure S9 Comparison of myeloid cell infiltrations in the tumor area vs. the periphery.** The tumor areas and the peripheries of tumors circled under pathologist guidance. The densities of various myeloid cell subtypes as indicated were compared between tumor areas and peripheries of tumors. Paired t tests were done. Tumor areas and peripheries on the same cases were connected by a line. **A.** DCC, distal cholangiocarcinoma; **B.** ICC, intrahepatic cholangiocarcinoma.

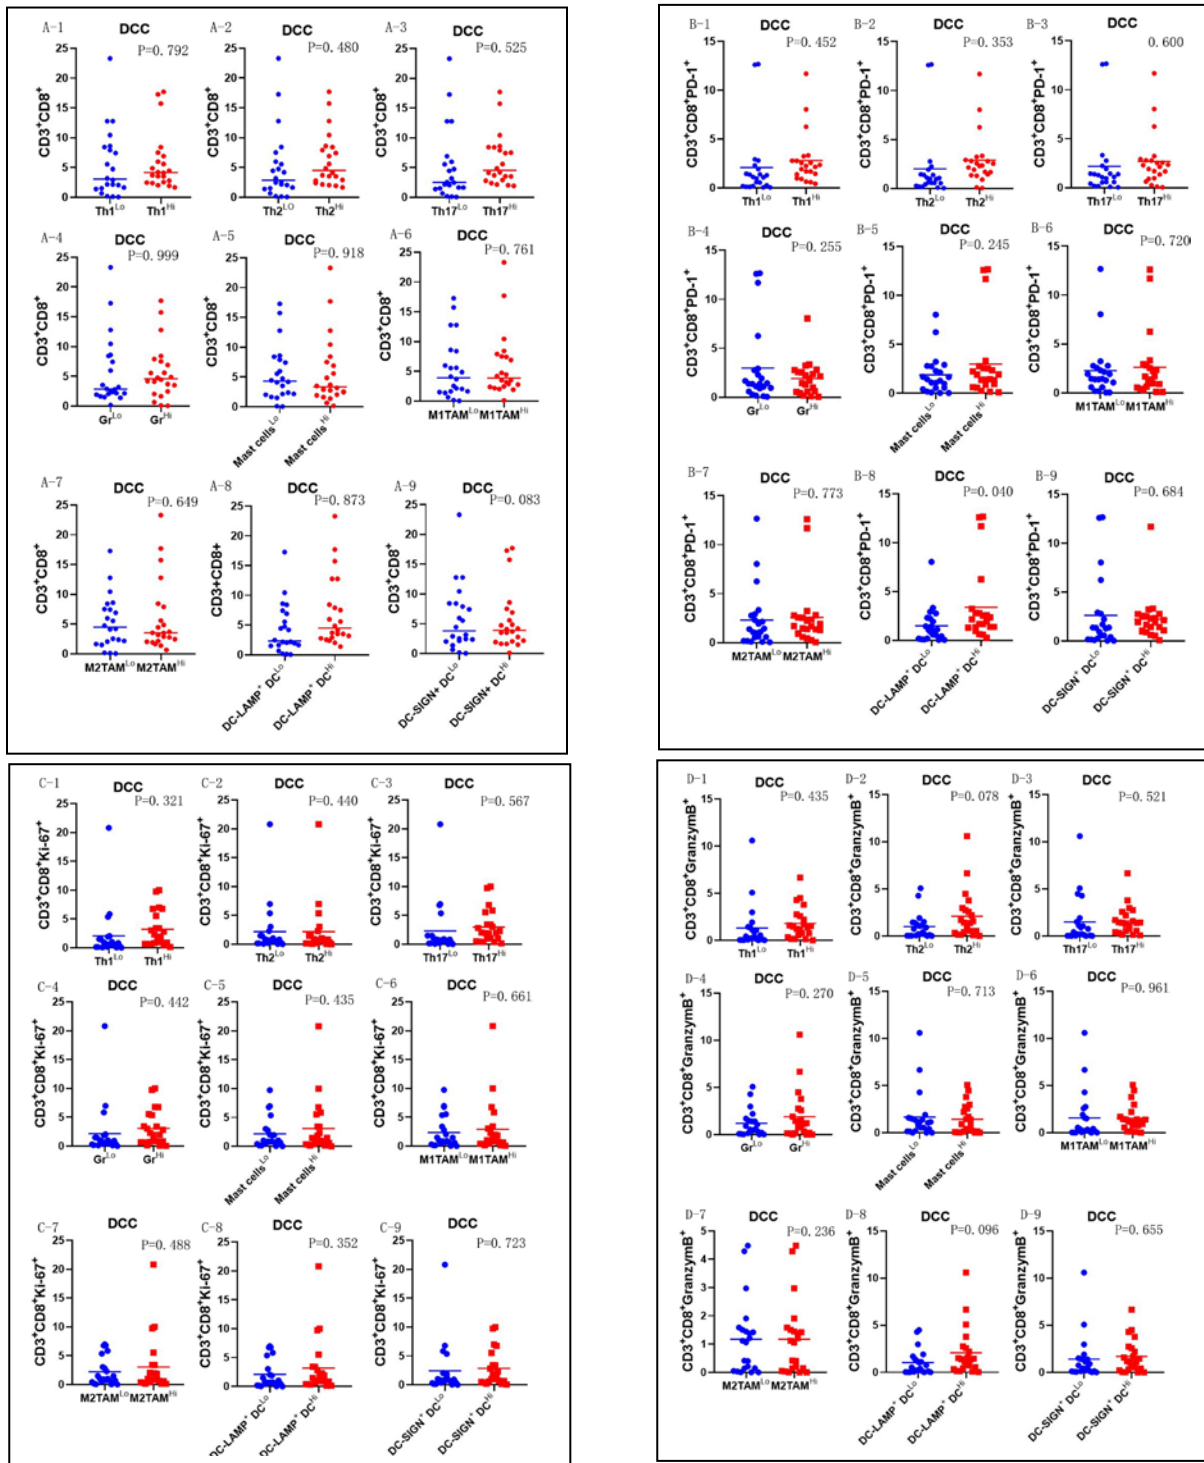

**Figure S10 Comparing various effector T cell subtypes between distal cholangiocarcinomas (DCC) with higher vs. lower density of regulatory immune cells. t tests were performed with p value indicated.**

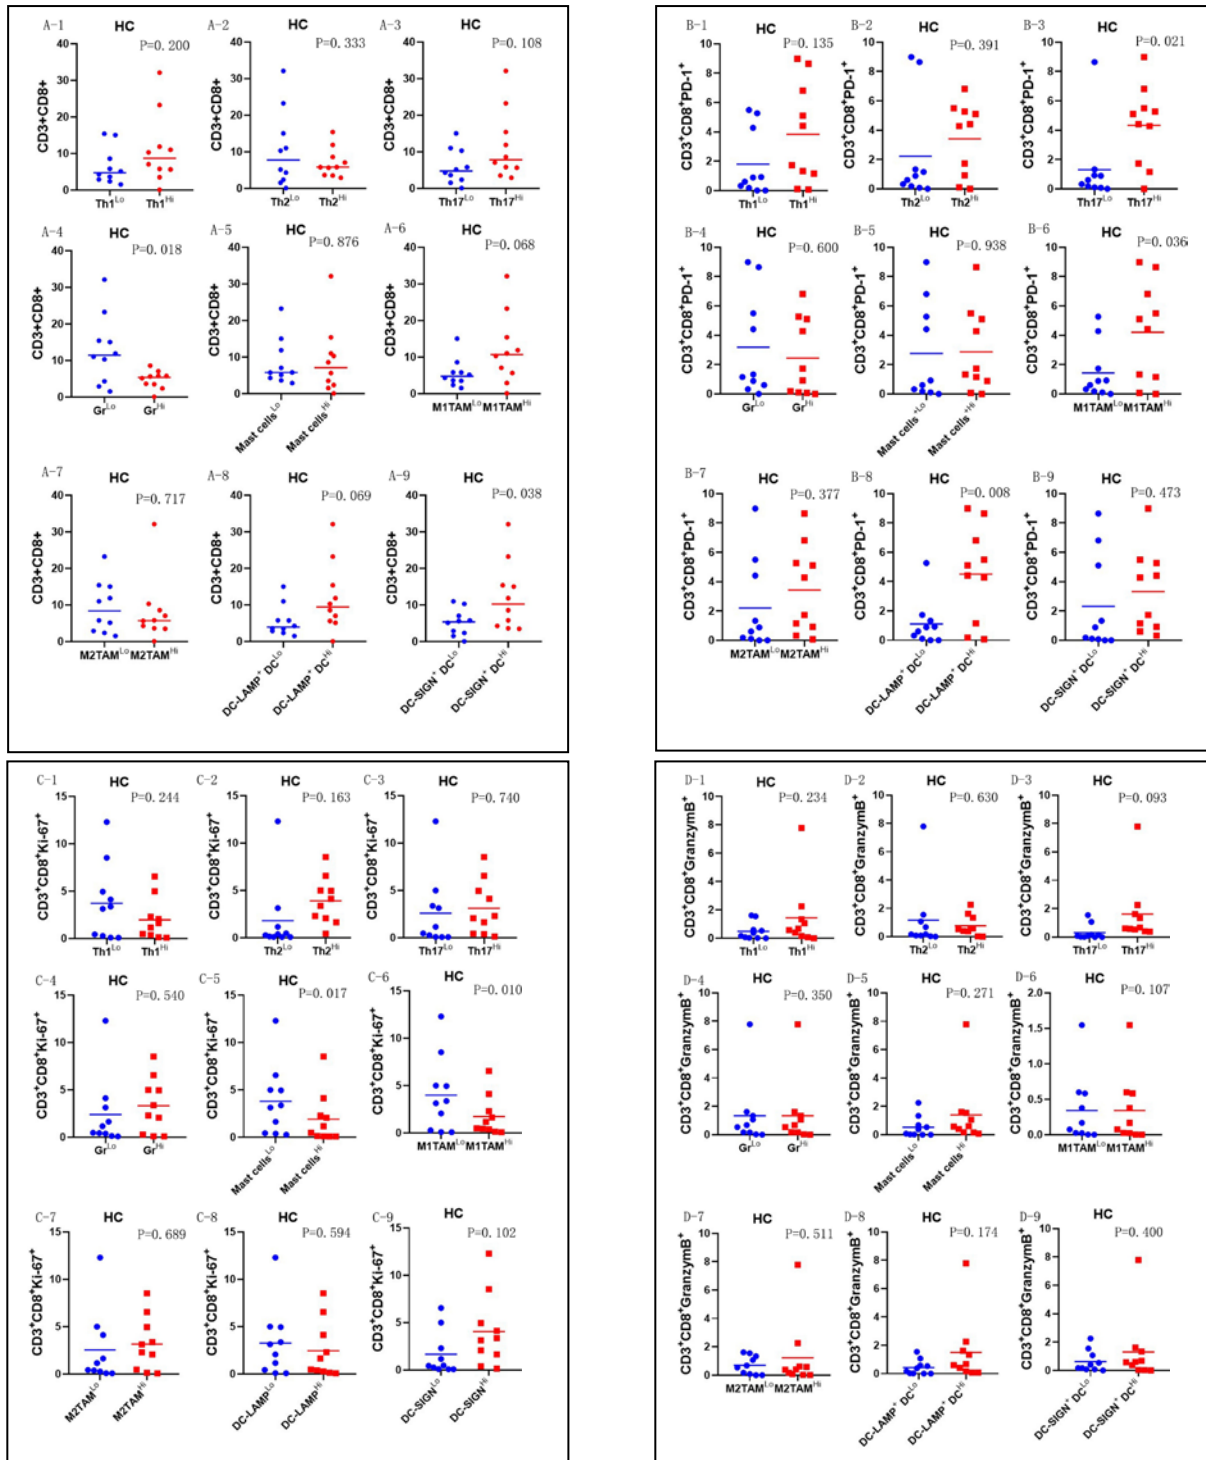

**Figure S11 Comparing various effector T cell subtypes between hilar cholangiocarcinomas (HC) with higher vs. lower density of regulatory immune cells. t tests were performed with p value indicated.**

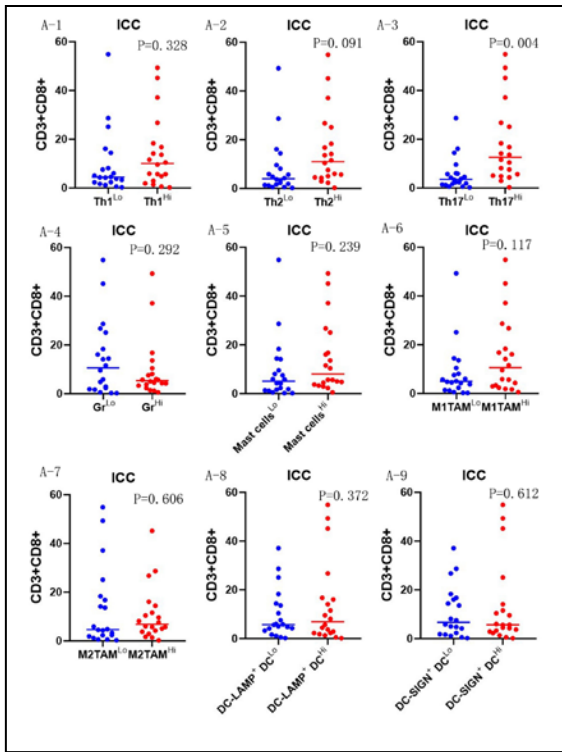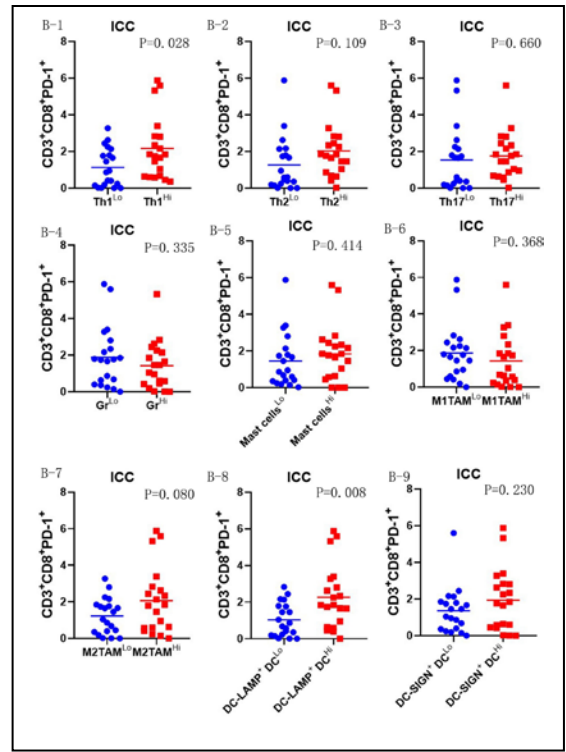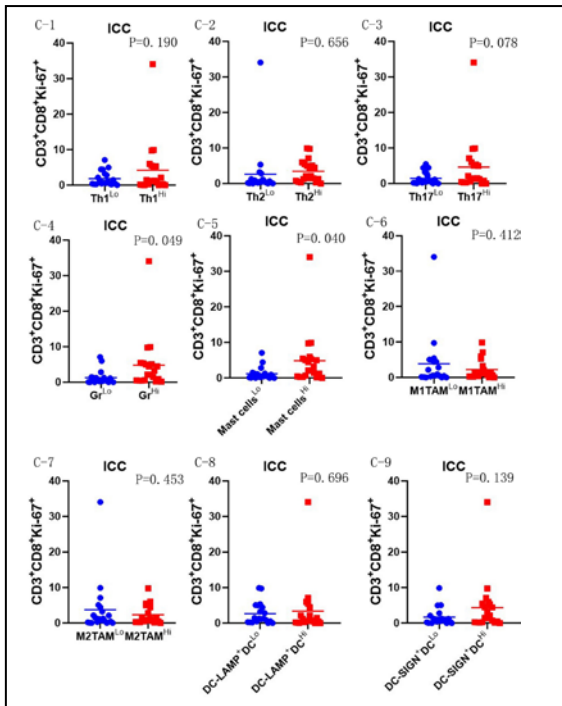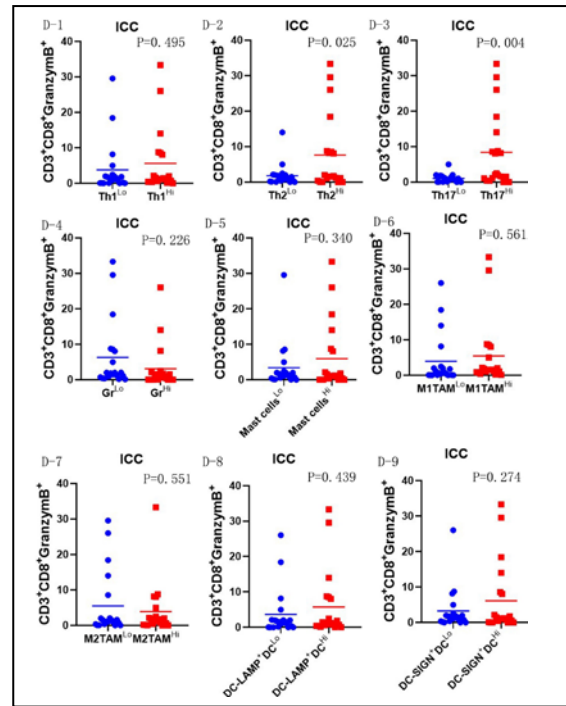

**Figure S12 Comparing various effector T cell subtypes between intrahepatic cholangiocarcinomas (ICC) with higher vs. lower density of regulatory immune cells. t tests were performed with p value indicated.**

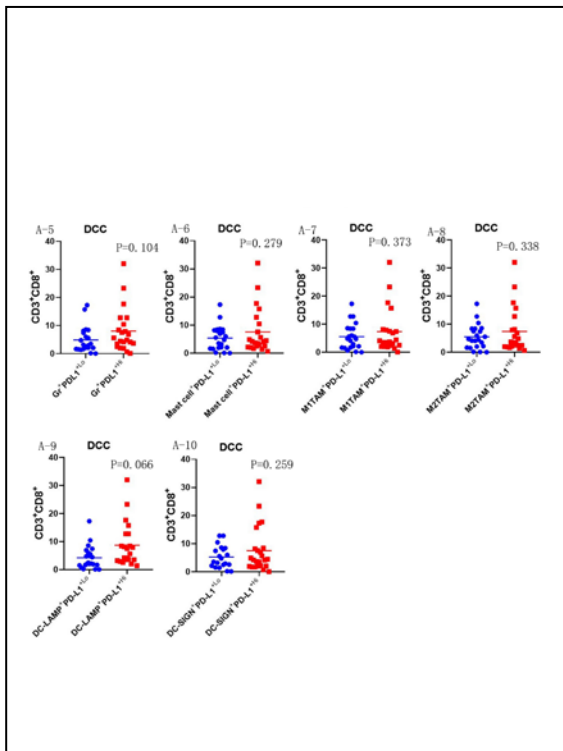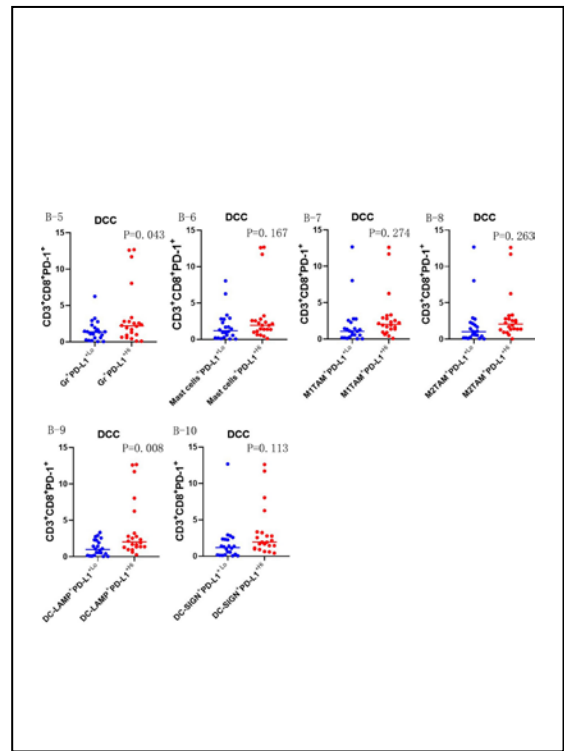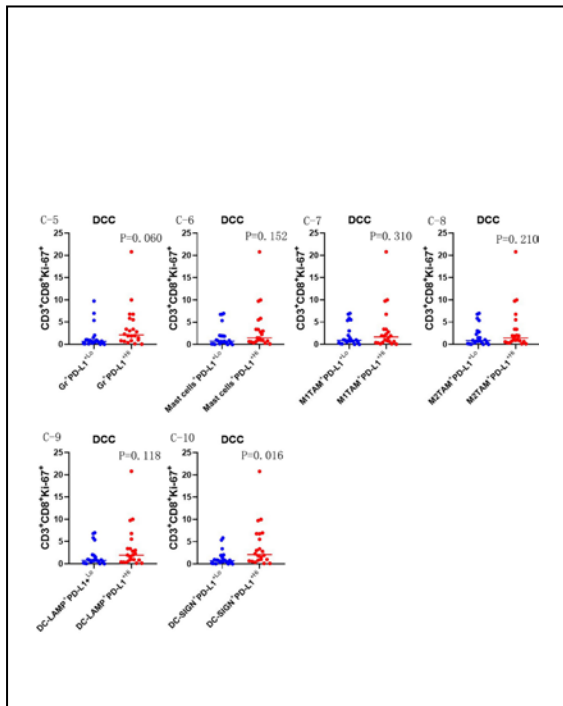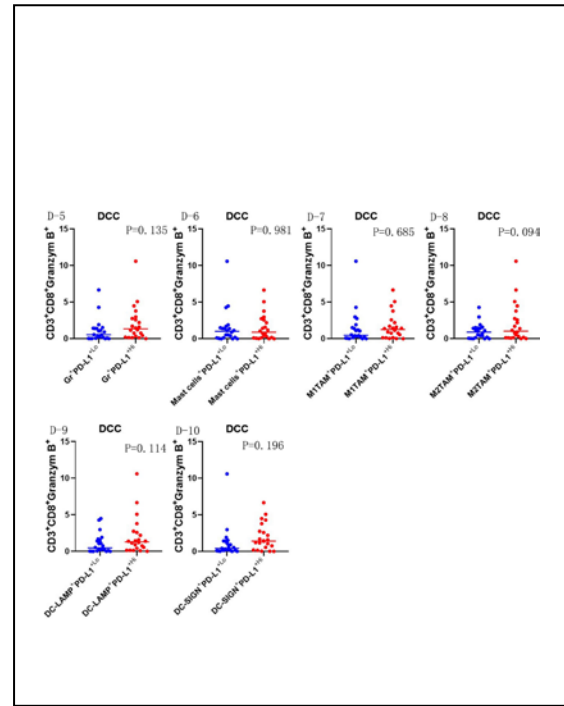

**Figure S13 Comparing various effector T cell subtypes between distal cholangiocarcinomas (DCC) with higher vs. lower density of regulatory immune cells positive for PD-L1. t tests were performed with p value indicated.**

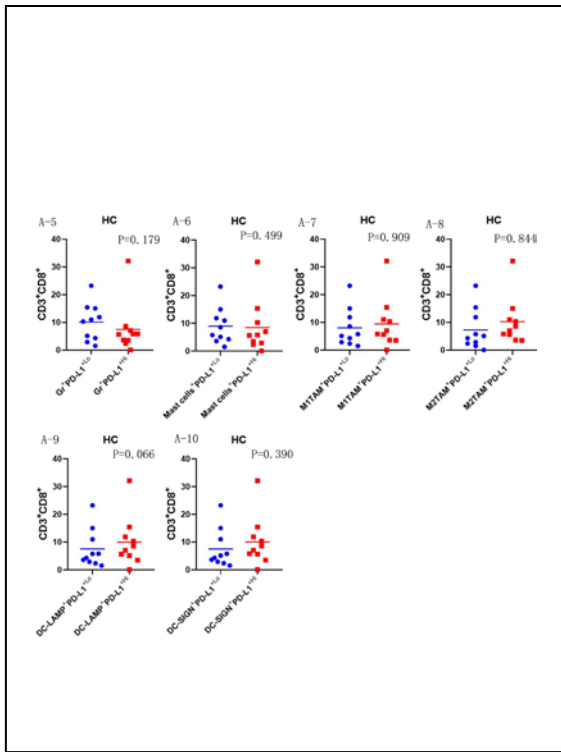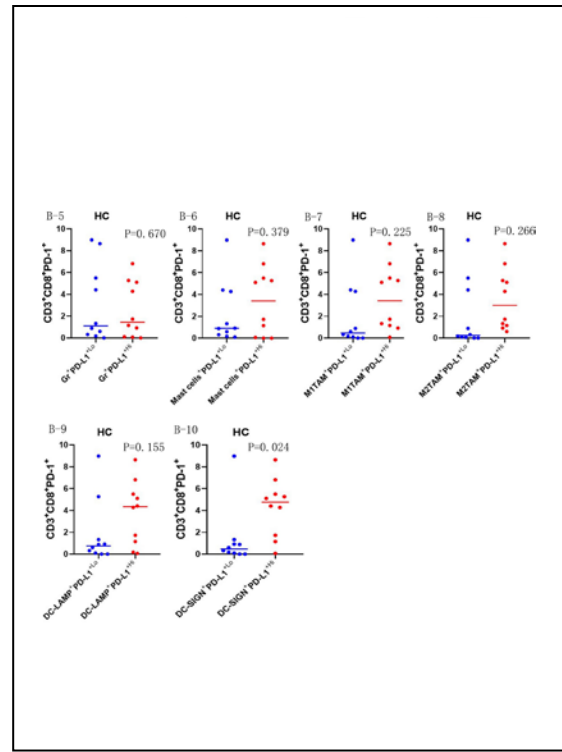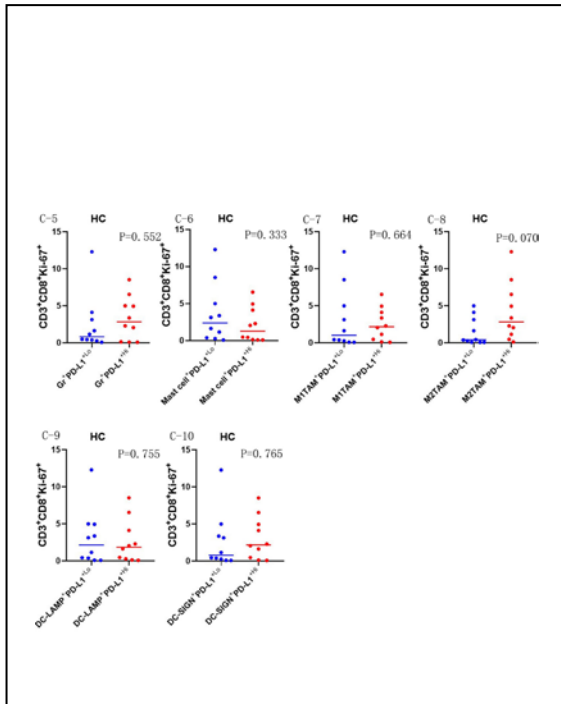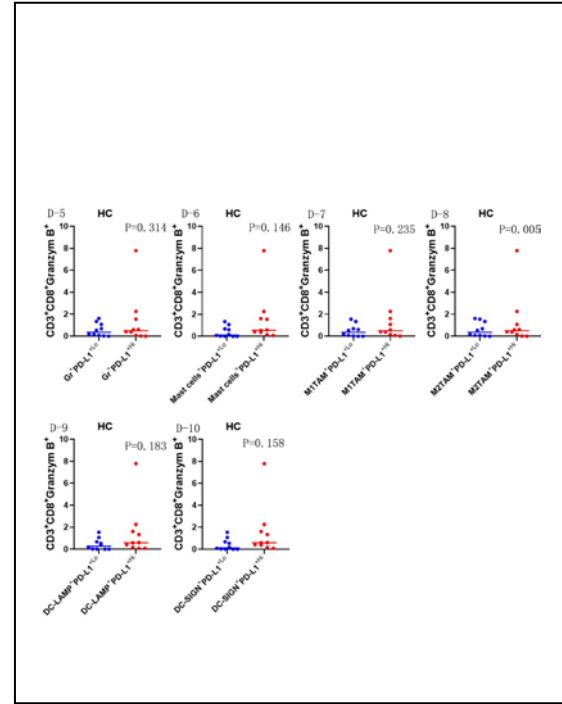

**Figure S14 Comparing various effector T cell subtypes between hilar cholangiocarcinomas (HC) with higher vs. lower density of regulatory immune cells positive for PD-L1. t tests were performed with p value indicated.**



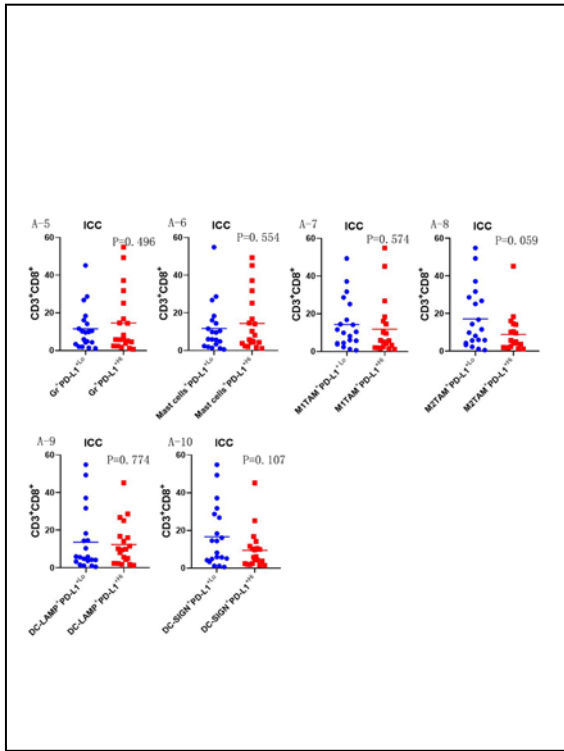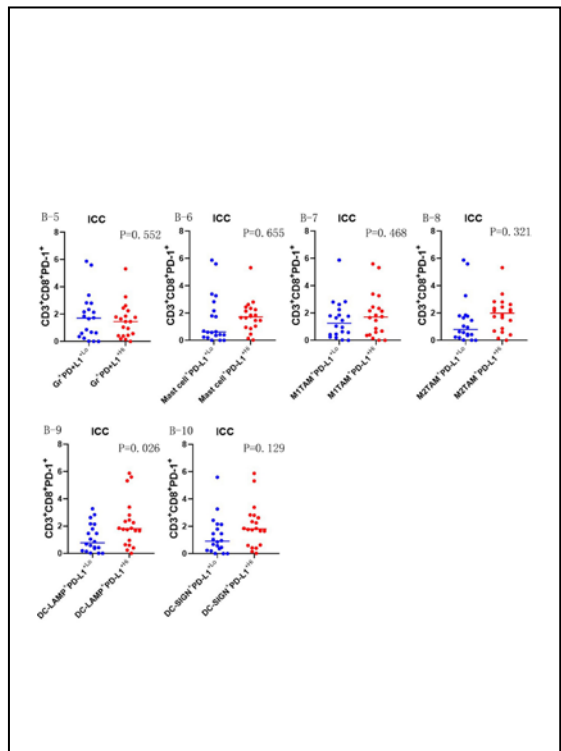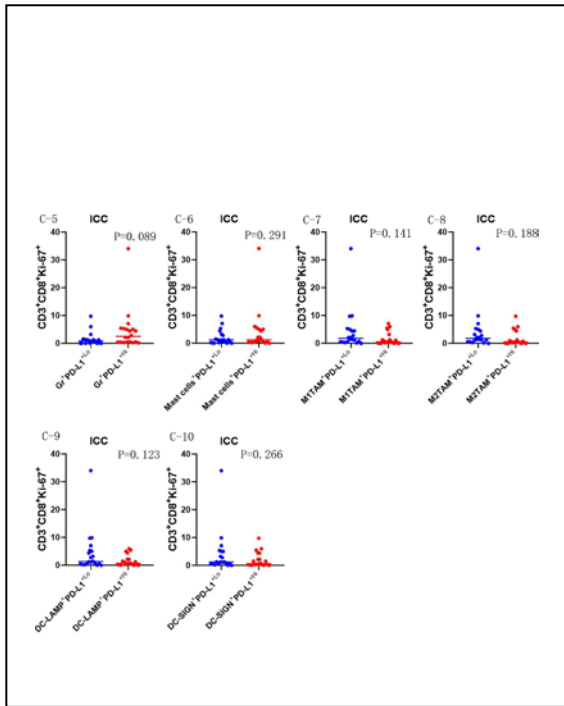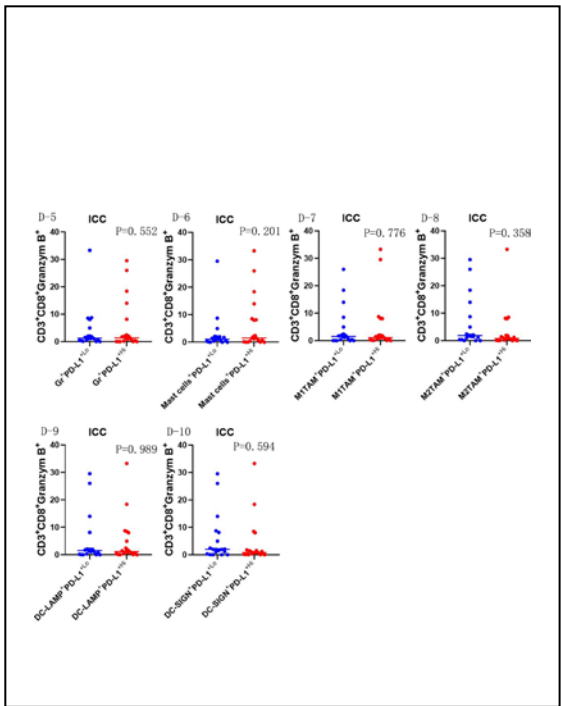

**Figure S15 Comparing various effector T cell subtypes between intrahepatic cholangiocarcinomas (ICC) with higher vs. lower density of regulatory immune cells positive for PD-L1. t tests were performed with p value indicated.**

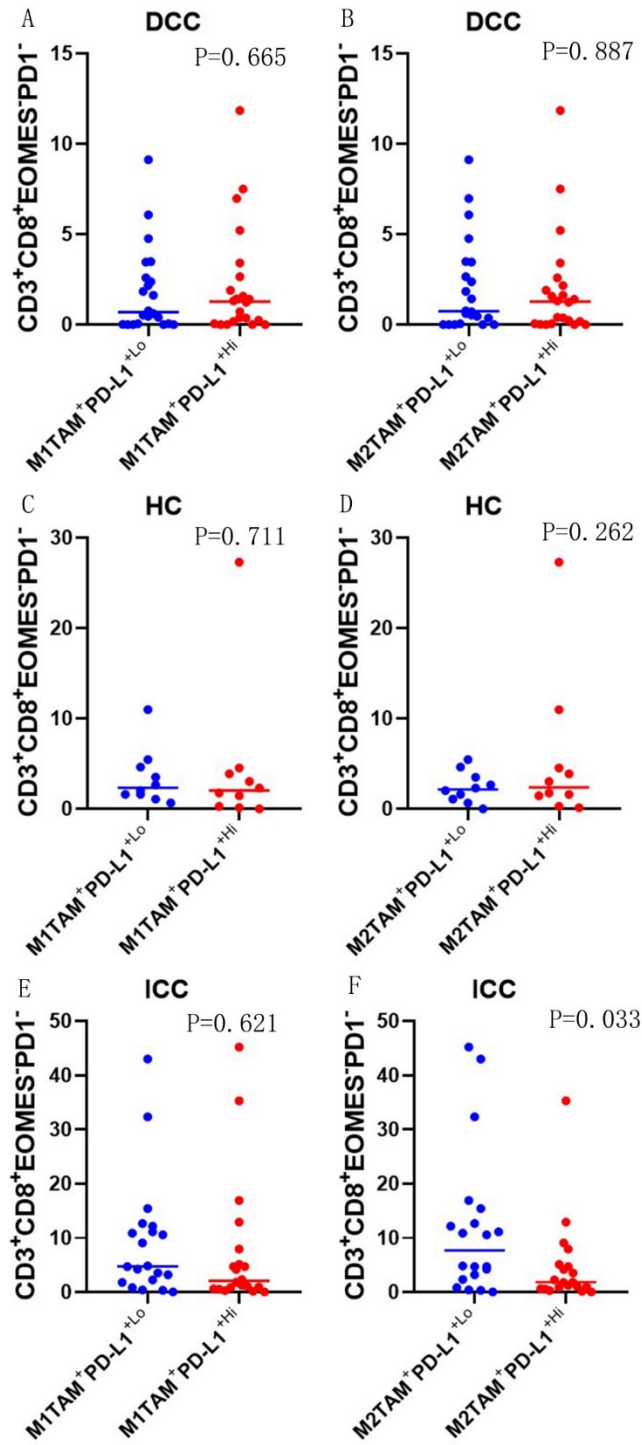

**Figure S16 Comparing non-exhausted CD8<sup>+</sup> cells between cholangiocarcinoma with higher vs. lower density of TAMs positive for PD-L1.** t tests were performed with p value indicated. DCC, distal cholangiocarcinoma; HC, hilar cholangiocarcinoma; ICC, intrahepatic cholangiocarcinoma.

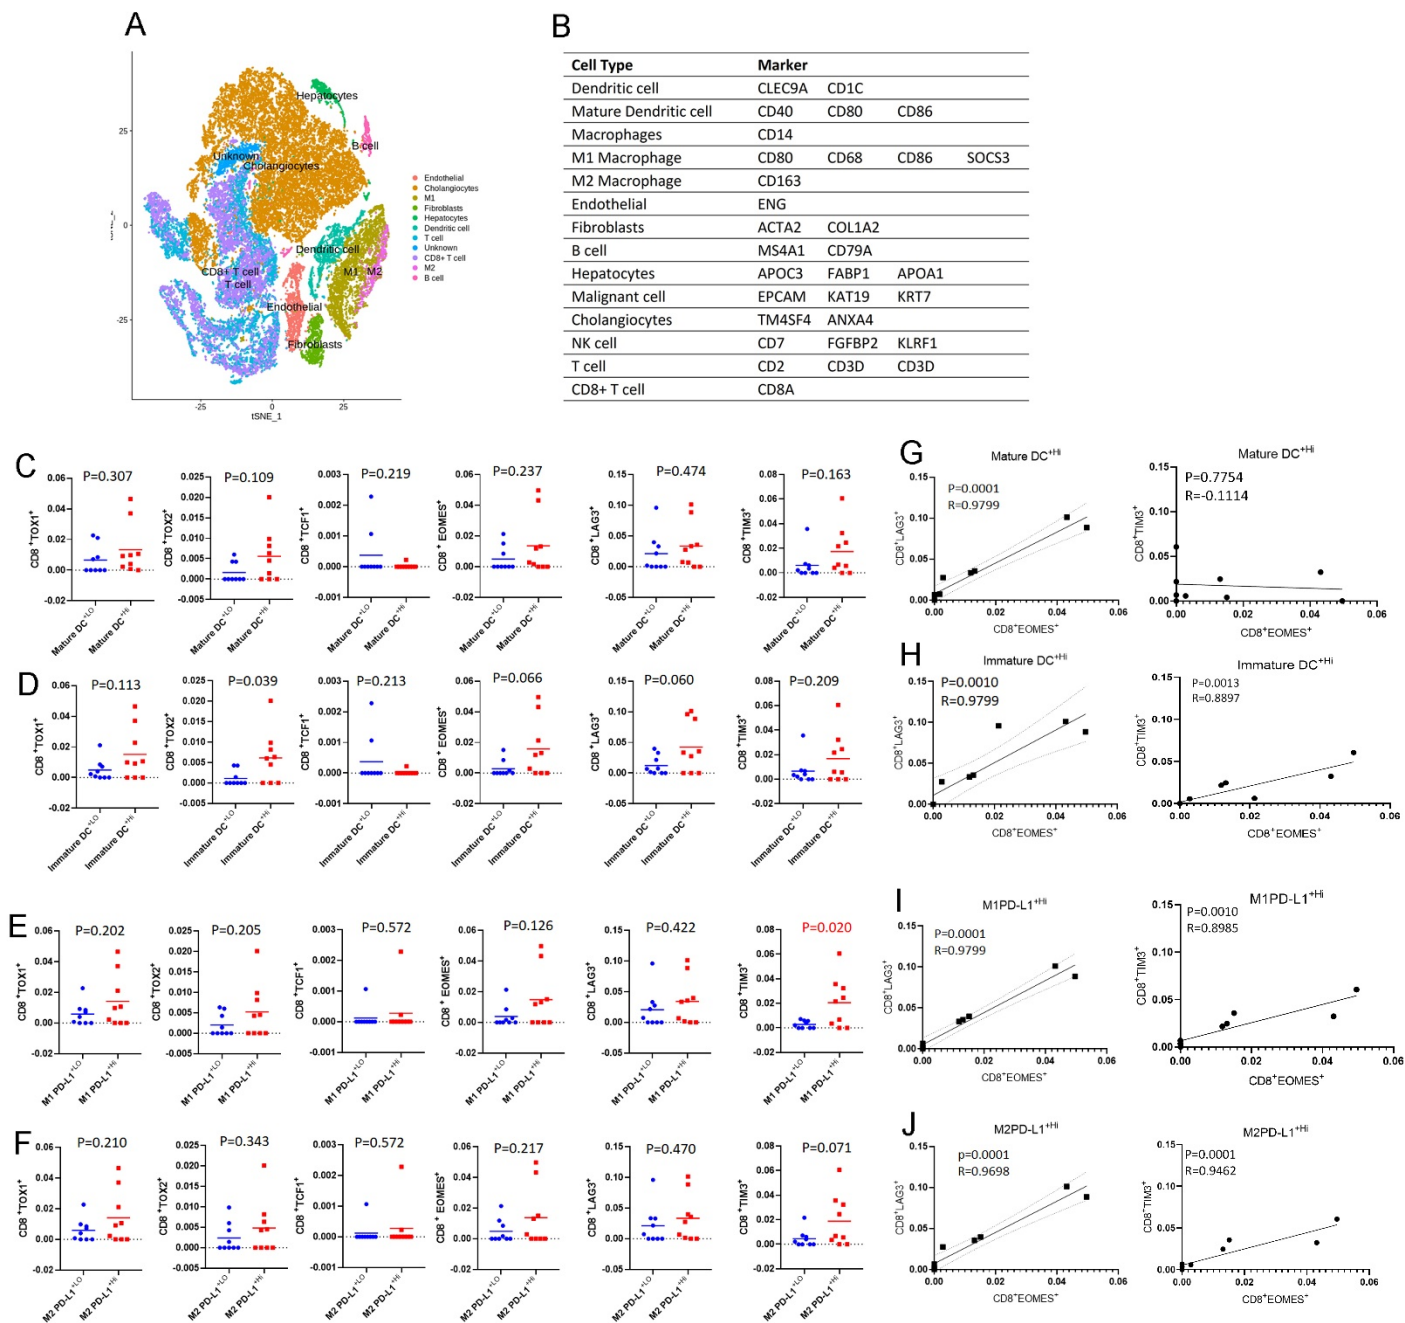

**Figure S17 Single cell RNA sequencing analysis of T cell exhaustion signals in CD8+ cells and their correlations with the density of dendritic cells and TAMs in intrahepatic cholangiocarcinoma.** Single cell RNA sequencing results of human intrahepatic cholangiocarcinoma (ICC) were obtained from GSE138709<sup>1</sup> (n=10) and GSE125449<sup>2</sup> (n=10) and combined. The Seurat R package (version 4.0.1) was used for batch integration and the dimensionality reduction analysis. Those single cells that had the transcripts of > 200 genes were filtered in and a total of 40024 cells were analyzed. **A.** Cells were clustered by the t-Distributed Stochastic Neighbor Embedding (t-SNE) method. **B.** Markers that were used to identify each cell type. Selection of these markers was made according to the literature<sup>1</sup>. **C.** The 18 ICC samples were divided into two groups, those with a higher percentage of mature dendritic cells (DC) (Mature DC<sup>Hi</sup>) and those with a lower percentage of mature dendritic cells (Mature DC<sup>Lo</sup>) among all cells in the respective samples, by using the median percentage of mature DCs as the cutoff. **D.** The 18 ICC samples were divided into two groups, those with a higher percentage of immature dendritic cells (DC) (Immature DC<sup>Hi</sup>) and those with a lower percentage of immature dendritic cells

(Immature DC<sup>L0</sup>) among all cells in the respective samples, by using the median percentage of immature DCs as the cutoff. **E.** The 18 ICC samples were divided into two groups, those with a higher percentage of PD-L1+ M1 macrophages (M1 PD-L1<sup>Hi</sup>) and those with a lower percentage of PD-L1+ M1 macrophages (M1 PD-L1<sup>L0</sup>) among all cells in the respective samples, by using the median percentage of PD-L1+ M1 macrophages as the cutoff. **F.** The 18 ICC samples were divided into two groups, those with a higher percentage of PD-L1+ M2 macrophages (M2 PD-L1<sup>Hi</sup>) and those with a lower percentage of PD-L1+ M2 macrophages (M2 PD-L1<sup>L0</sup>) among all cells in the respective samples, by using the median percentage of PD-L1+ M2 macrophages as the cutoff. In **C, D, E, F**, the ratios of the number of CD8+ T cells that express the T cell exhaustion signals as indicated to the total number of CD8+ T cells within each sample were compared between the two groups described above by unpaired t tests. The correlation between the ratios of the number of CD8+ T cells that express EOMES to the total number of CD8+ T cells and the ratios of the number of CD8+ T cells that express LAG3 or TIM3 as indicated to the total number of CD8+ T cells within each sample in the groups with (**G**) Mature DC<sup>Hi</sup>, (**H**) immature DC<sup>Hi</sup>, (**I**) M1 PD-L1<sup>Hi</sup>, or (**J**) M2 PD-L1<sup>Hi</sup>, respectively, was assessed by linear regression. p values <0.01 and co-efficient R values close to 1.0 suggest a strong correlation between EOMES and LAG3 in all four groups and between EOMES and TIM3 in all the groups except Mature DC<sup>Hi</sup>.

### References in Supplementary Materials

1. Zhang, M., *et al.* Single-cell transcriptomic architecture and intercellular crosstalk of human intrahepatic cholangiocarcinoma. *J Hepatol* **73**, 1118-1130 (2020).
2. Ma, L., *et al.* Tumor Cell Biodiversity Drives Microenvironmental Reprogramming in Liver Cancer. *Cancer Cell* **36**, 418-430 e416 (2019).

**Supplementary Table S1 Patient Clinicopathologic Characteristics**

| <b>Characteristics</b>  | <b>Distal Cholangiocarcinoma<br/>(DCC) (N=44)</b> | <b>Hilar Cholangiocarcinoma<br/>(HC) (N=20)</b> | <b>Intrahepatic Cholangiocarcinoma<br/>(ICC) (N=40)</b> |
|-------------------------|---------------------------------------------------|-------------------------------------------------|---------------------------------------------------------|
| <b>Gender</b>           |                                                   |                                                 |                                                         |
| <b>Male</b>             | 28                                                | 13                                              | 17                                                      |
| <b>Female</b>           | 16                                                | 7                                               | 23                                                      |
| <b>Age(years)</b>       | 66.50                                             | 66.20                                           | 62.68                                                   |
| <b>TNM Stage</b>        |                                                   |                                                 |                                                         |
| <b>I</b>                | 0                                                 | 2                                               | 20                                                      |
| <b>II</b>               | 35                                                | 9                                               | 12                                                      |
| <b>III</b>              | 9                                                 | 9                                               | 8                                                       |
| <b>Resection margin</b> |                                                   |                                                 |                                                         |
| <b>R0</b>               | 36                                                | 9                                               | 30                                                      |
| <b>R1</b>               | 7                                                 | 11                                              | 10                                                      |
| <b>R2</b>               | 1                                                 | 0                                               | 0                                                       |
| <b>Tumor sizes(cm)</b>  | 2.2                                               | 2.9                                             | 4.8                                                     |
| <b>Histologic grade</b> |                                                   |                                                 |                                                         |
| <b>Well</b>             | 5                                                 | 5                                               | 5                                                       |
| <b>Moderately</b>       | 23                                                | 10                                              | 24                                                      |
| <b>Poor</b>             | 16                                                | 5                                               | 11                                                      |
| <b>Adjuvant chemo</b>   |                                                   |                                                 |                                                         |
| <b>Yes</b>              | 20                                                | 8                                               | 14                                                      |
| <b>No</b>               | 22                                                | 12                                              | 26                                                      |

**Supplementary Table S2 Multiplex Immunohistochemistry Procedures and Antibody Information**

**Table S2-1 The Multiplex IHC Master Panel – One single panel including both lymphoid and myeloid cell markers**

|                                          | <b>Cycle 0</b>     | <b>Cycle1</b>        | <b>Cycle2</b>        | <b>Cycle3</b>         | <b>Cycle4</b>        |
|------------------------------------------|--------------------|----------------------|----------------------|-----------------------|----------------------|
| Primary antibody                         | Hematoxylin        | CD68                 | PD-1                 | PD-L1                 | CD163                |
| Clone/Product#                           | S3301              | PG-M1                | NAT105               | E113N                 | 10D6                 |
| Vendor                                   | Dako               | Abcam                | Abcam                | Cell Signaling        | Thermo Scientific    |
| Concentration(mg/ml)                     |                    | 0.000266             | 0.02                 | 0.00874               | 1/100*               |
| Primary Ab Reaction Time                 | 1 min              | 30 min               | 2 h                  | 2 h                   | 30 min               |
| HISTOFINE Secondary Ab and Reaction Time |                    | Anti-mouse<br>30 min | Anti-mouse<br>30 min | Anti-rabbit<br>30 min | Anti-mouse<br>30 min |
| AEC reaction time                        |                    | 20 min               | 1 h                  | 1 h                   | 30 min               |
|                                          | <b>Cycle5</b>      | <b>Cycle6</b>        | <b>Cycle7</b>        | <b>Cycle8</b>         | <b>Cycle9</b>        |
| Primary antibody                         | DC-LAMP            | DC-SIGN              | Tbet                 | MHCII                 | Foxp3                |
| Clone/Product#                           | 1010e1.01          | DC-28                | 4B/10                | ERP112266             | 236A/E7              |
| Vendor                                   | Novus Biological   | Santa Cruz           | Santa Cruz           | Abcam                 | eBioscience          |
| Concentration(mg/ml)                     | 0.005              | 0.002                | 0.002                | 0.00026               | 0.0125               |
| Primary Ab Reaction Time                 | 30 min             | 30 min               | 30 min               | 30 min                | 30 min               |
| HISTOFINE Secondary Ab and Reaction Time | Anti-rat<br>30 min | Anti-mouse<br>30 min | Anti-mouse<br>30 min | Anti-rabbit<br>30 min | Anti-mouse<br>30 min |
| AEC reaction time                        | 30 min             | 1 h                  | 30 min               | 20 min                | 20 min               |
|                                          | <b>Cycle10</b>     | <b>Cycle11</b>       | <b>Cycle12</b>       | <b>Cycle 13</b>       | <b>Cycle14</b>       |
| Primary antibody                         | CD4                | CD8                  | Granzyme B           | CSF1R                 | CD3                  |
| Clone/Product#                           | 4B12               | C8/144b              | EP230                | SP211                 | Sp7                  |
| Vendor                                   | Thermo Scientific  | Thermo Scientific    | Sigma Aldrich        | Abcam                 | Thermo Scientific    |
| Concentration(mg/ml)                     | 1/25*              | 0.005                | 0.004552             | 0.00064               | 1/150*               |

|                                          |                     |                     |                     |                      |                      |
|------------------------------------------|---------------------|---------------------|---------------------|----------------------|----------------------|
| Primary Ab Reaction Time                 | 30min               | 30min               | 30min               | 30min                | 30min                |
| HISTOFINE Secondary Ab and Reaction Time | Anti-mouse<br>30min | Anti-mouse<br>30min | Anti-mouse<br>30min | Anti-rabbit<br>30min | Anti-rabbit<br>30min |
| AEC reaction time                        | 30 min              | 30 min              | 30 min              | 20 min               | 40 min               |

|                                          | <b>Cycle15</b>       | <b>Cycle16</b>       | <b>Cycle17</b>       | <b>Cycle18</b>       | <b>Cycle19</b>       |
|------------------------------------------|----------------------|----------------------|----------------------|----------------------|----------------------|
| Primary antibody                         | GATA3                | CD66b                | CD56                 | CD20                 | Tryptase             |
| Clone/Product#                           | L50-823              | G10f5                | 123c3                | 0.N.85               | AA1                  |
| Vendor                                   | BD                   | eBioscience          | Santa Cruz           | Santa Cruz           | Abcam                |
| Concentration(mg/ml)                     | 0.005                | 0.016667             | 0.004                | 0.0005               | 0.00005              |
| Primary Ab Reaction Time                 | 30 min               | 30 min               | 30 min               | 30 min               | 30 min               |
| HISTOFINE Secondary Ab and Reaction Time | Anti-mouse<br>30 min | Anti-mouse<br>30 min | Anti-mouse<br>30 min | Anti-mouse<br>30 min | Anti-mouse<br>30 min |
| AEC reaction time                        | 30 min               | 20 min               | 20 min               | 1 h                  | 20 min               |

|                                          | <b>Cycle20</b>       | <b>Cycle21</b>       | <b>Cycle22</b>       |
|------------------------------------------|----------------------|----------------------|----------------------|
| Primary antibody                         | RORgt                | Ki67                 | CD45                 |
| Clone/Product#                           | 6F3.1                | Sp6                  | H130                 |
| Vendor                                   | EMD<br>Millipore     | Abcam                | Thermo<br>Scientific |
| Concentration(mg/ml)                     | 0.0005               | 0.0003               | 0.005                |
| Primary Ab Reaction Time                 | 30 min               | 1 h                  | 30 min               |
| HISTOFINE Secondary Ab and Reaction Time | Anti-mouse<br>30 min | Anti-mouse<br>30 min | Anti-mouse<br>30 min |
| AEC reaction time                        | 20 min               | 30 min               | 30 min               |

**Table S2-2 The Multiplex IHC Panel I – The lymphoid cell marker panel**

|                          | <b>Cycle1</b> | <b>Cycle2</b> | <b>Cycle3</b>  | <b>Cycle4</b> | <b>Cycle5</b> |
|--------------------------|---------------|---------------|----------------|---------------|---------------|
| Primary antibody         | CD68          | PD-L1         | Granzyme B     | Gata3         | CD66b         |
| Clone/Product#           | PG-M1         | E113N         | EP230          | L50-823       | G10f5         |
| Vendor                   | Abcam         | Abcam         | Cell signaling | Invitrogen    | Dendritics    |
| Concentration(mg/ml)     | 0.000266      | 0.00874       | 0.004552       | 0.005         | 0.016667      |
| Primary Ab Reaction Time | 30 min        | 2 h           | 1 h            | 30 min        | 30 min        |

|                            |        |        |        |        |        |
|----------------------------|--------|--------|--------|--------|--------|
| Secondary Ab Reaction Time | 30 min | 30 min | 30 min | 30 min | 30 min |
| AEC reaction time          | 45 min | 2 h    | 2 h    | 90 min | 30 min |

|                                          | <b>Cycle6</b>     | <b>Cycle7</b> | <b>Cycle8</b> | <b>Cycle9</b> | <b>Cycle10</b> |
|------------------------------------------|-------------------|---------------|---------------|---------------|----------------|
| Primary antibody                         | CD3               | CD56          | CD20          | Ki-67         | FOXP3          |
| Clone/Product#                           | Sp7               | 123c3         | 0.N.85        | Sp6           | 236A/E7        |
| Vendor                                   | Thermo Scientific | Invitrogen    | Santa Cruz    | Abcam         | eBioscience    |
| Concentration(mg/ml)                     | 1/150*            | 0.004         | 0.0005        | 0.0003        | 0.0125         |
| Primary Ab Reaction Time                 | 30 min            | 30 min        | 30 min        | 1 h           | 30 min         |
| HISTOFINE Secondary Ab and Reaction Time | 30 min            | 30 min        | 30 min        | 30 min        | 30 min         |
| AEC reaction time                        | 2 h               | 25 min        | 1 h           | 30 min        | 2 h            |

|                                          | <b>Cycle11</b> | <b>Cycle12</b> | <b>Cycle13</b> | <b>Cycle 14</b> | <b>Cycle15</b> |
|------------------------------------------|----------------|----------------|----------------|-----------------|----------------|
| Primary antibody                         | CD4            | Tryptase       | CD8            | Rorgt           | EpCAM          |
| Clone/Product#                           | 4B12           | AA1            | C8/144b        | 6F3.1           | E144           |
| Vendor                                   | Invitrogen     | Abcam          | eBioscience    | EMD             | Abcam          |
| Concentration(mg/ml)                     | 1/25*          | 0.00005        | 0.005          | 0.0005          | 0.000198       |
| Primary Ab Reaction Time                 | 30 min         | 30 min         | 30 min         | 30 min          | 60 min         |
| HISTOFINE Secondary Ab and Reaction Time | 30 min         | 30 min         | 30 min         | 30 min          | 30 min         |
| AEC reaction time                        | 60 min         | 20 min         | 45 min         | 20 min          | 25 min         |

**Table S2-3 The Multiplex IHC Panel II – The myeloid cell marker panel**

|                                          | <b>Cycle1</b> | <b>Cycle2</b> | <b>Cycle3</b>  | <b>Cycle4</b> | <b>Cycle5</b> |
|------------------------------------------|---------------|---------------|----------------|---------------|---------------|
| Primary antibody                         | CD68          | PD1           | PDL1           | CD163         | DC-LAMP       |
| Clone/Product#                           | PG-M1         | NAT105        | E113N          | 10D6          | 1010e1.01     |
| Vendor                                   | Abcam         | Abcam         | Cell Signaling | Thermo        | Dendritics    |
| Concentration(mg/ml)                     | 0.000266      | 0.02          | 0.00874        | 1/100*        | 0.005         |
| Primary Ab Reaction Time                 | 30 min        | 2 h           | 2 h            | 30 min        | 30 min        |
| HISTOFINE Secondary Ab and Reaction Time | 30 min        | 30 min        | 30 min         | 30 min        | 30 min        |
| AEC reaction time                        | 25 min        | 2 h           | 2 h            | 30 min        | 60 min        |



|                                          | <b>Cycle6</b> | <b>Cycle7</b>  | <b>Cycle8</b> | <b>Cycle9</b> | <b>Cycle10</b> |
|------------------------------------------|---------------|----------------|---------------|---------------|----------------|
| Primary antibody                         | DC-SIGN       | t-bet          | MHC-II        | CD45          | FOXP3          |
| Clone/Product#                           | DC-28         | SC21749(4B/10) | ERP112266     | H130          | 236A/E7        |
| Vendor                                   | Santa Cruz    | Santa Cruz     | Abcam         | BD            | eBioscience    |
| Concentration(mg/ml)                     | 0.002         | 0.002          | 0.00026       | 0.005         | 0.0125         |
| Primary Ab Reaction Time                 | 30 min        | 30 min         | 30 min        | 30 min        | 30 min         |
| HISTOFINE Secondary Ab and Reaction Time | 30 min        | 30 min         | 30 min        | 30 min        | 30 min         |
| AEC reaction time                        | 60 min        | 2 h            | 20 min        | 45 min        | 2 h            |

|                                          | <b>Cycle11</b> | <b>Cycle12</b> | <b>Cycle13</b> | <b>Cycle 14</b> | <b>Cycle 15</b> |
|------------------------------------------|----------------|----------------|----------------|-----------------|-----------------|
| Primary antibody                         | CD4            | CD8            | Tbr2           | Csf1R           | EpCAM           |
| Clone/Product#                           | 4B12           | C8/144b        | Ab2283         | SP211           | E144            |
| Vendor                                   | Invitrogen     | eBioscience    | EMD            | Abcam           | Abcam           |
| Concentration(mg/ml)                     | 1/25*          | 0.005          | 0.0001         | 0.00064         | 0.000198        |
| Primary Ab Reaction Time                 | 2 h            | 30 min         | 30 min         | 30 min          | 60 min          |
| HISTOFINE Secondary Ab and Reaction Time | 30 min         | 30 min         | 30 min         | 30 min          | 30 min          |
| AEC reaction time                        | 60 min         | 45 min         | 20 min         | 30 min          | 25 min          |

\*Dilution information provided as the concentration of the stocks is not determined by vendors

**Supplementary Table S3 Lymphoid and myeloid cell types defined by multiplex IHC markers**

| <b>Cell Types</b>                 | <b>IHC Markers</b>                                             |
|-----------------------------------|----------------------------------------------------------------|
| CD8+ T cells                      | CD45+CD3+CD8+                                                  |
| CD8+ Granzyme B+ T cells          | CD45+CD3+CD8+GranzymeB+                                        |
| CD8+ Ki67+ T cells                | CD45+CD3+CD8+KI67+                                             |
| CD8+ EOMES+ PD-1+ T cells         | CD45+CD3+CD8+EOMES+PD1+                                        |
| CD8+ EOMES+ PD-1- T cells         | CD45+CD3+CD8+EOMES+PD1-                                        |
| CD8+ EOMES- PD-1+ T cells         | CD45+CD3+CD8+EOMES-PD1+                                        |
| CD8+ EOMES- PD-1- T cells         | CD45+CD3+CD8+EOMES-PD1-                                        |
| CD4+ T cells                      | CD45+CD3+CD4+                                                  |
| CD4+ PD-1+ T cells                | CD45+CD3+CD4+PD-1+                                             |
| Regulatory T cells                | CD45+CD3+CD4+FOXP3+                                            |
| Th1                               | CD45+CD3+CD4+FOXP3-Tbet+RORgT-                                 |
| Th2                               | CD45+CD3+CD4+FOXP3-GATA3+RORgT-                                |
| Th17                              | CD45+CD3+CD4+FOXP3-RORgT+FOXP3-                                |
| Natural killer (NK) cells         | CD45+CD3-CD56+                                                 |
| B cells                           | CD45+CD3-CD56-CD20+                                            |
| Tumor associated macrophage (TAM) | CD45+CD3-CD20-CD56-CD66b-Tryptase-CSF1R+                       |
| PD-L1+ CSF1-R+ cells              | CD45+CD3-CD20-CD56-CD66b-Tryptase-CSF1R+PD-L1+                 |
| M1 TAM                            | CD45+CD3-CD20-CD56-CD66b-Tryptase-CSF1R+CD68+CD163-            |
| PD-L1+ M1 TAM                     | CD45+CD3-CD20-CD56-CD66b-Tryptase-CSF1R+CD68+CD163-PD-L1+      |
| M2 TAM                            | CD45+CD3-CD20-CD56-CD66b-Tryptase-CSF1R+CD68+CD163+            |
| PD-L1+ M2 TAM                     | CD45+CD3-CD20-CD56-CD66b-Tryptase-CSF1R+CD68+CD163+PD-L1+      |
| DC-SIGN+ dendritic cells          | CD45+CD3-CD20-CD56-CD66b-Tryptase-MHCII+DC-SIGN+DC-LAMP-       |
| PD-L1+ DC-SIGN+ dendritic cells   | CD45+CD3/CD20/CD56-CD66b-Tryptase-MHCII+DC-SIGN+DC-LAMP-PD-L1+ |
| DC-LAMP+ dendritic cells          | CD45+CD3/CD20/CD56-CD66b-Tryptase-MHCII+DC-LAMP+               |
| PD-L1+ DC-LAMP+ dendritic cells   | CD45+CD3/CD20/CD56-CD66b-Tryptase-MHCII+DC-LAMP+PD-L1+         |
| CD66b+ Granulocytes(Gr)           | CD45+CD3/CD20/CD56-CD66b+                                      |
| PD-L1+ Gr                         | CD45+CD3/CD20/CD56-CD66b+PD-L1+                                |
| Mast cells                        | CD45+CD3/CD20/CD56-CD66b-Tryptase+                             |
| PD-L1+ Mast cells                 | CD45+CD3/CD20/CD56-CD66b-Tryptase+PD-L1+                       |

## Supplementary Tables S4-S33

**Table S4 Univariate and multivariate analysis of correlation between the density of B cells and OS < 3 yr in DCC**

| DCC                                     | Univariate Analysis |              |       | Multivariate Analysis |              |       |
|-----------------------------------------|---------------------|--------------|-------|-----------------------|--------------|-------|
|                                         | Odds Ratio          | 95% CI       | p     | Odds Ratio            | 95% CI       | p     |
| <b>B cells:</b><br>High vs. Low         | 0.276               | 0.062, 1.233 | 0.092 | 0.251                 | 0.054, 1.177 | 0.08  |
| <b>N1 vs. N0</b>                        | 1.339               | 0.279, 6.434 | 0.715 | 0.969                 | 0.18, 5.2    | 0.97  |
| <b>Margin:</b><br>Positive vs. Negative | 1.212               | 0.212, 6.935 | 0.829 | 0.856                 | 0.129, 5.669 | 0.872 |

**Table S5 Univariate and multivariate analysis of correlation between the density of B cells and OS < 3 yr in HC**

| HC                                         | Univariate Analysis |               |       | Multivariate Analysis |                |       |
|--------------------------------------------|---------------------|---------------|-------|-----------------------|----------------|-------|
|                                            | Odds Ratio          | 95% CI        | p     | Odds Ratio            | 95% CI         | p     |
| <b>B cells:</b><br>High vs. Low            | 1.714               | 0.219, 13.406 | 0.608 | 1.581                 | 0.145, 17.227  | 0.707 |
| <b>N1 vs. N0</b>                           | 1.455               | 0.123, 17.233 | 0.766 | 0.906                 | 0.046, 17.766  | 0.948 |
| <b>Margin:</b><br>Positive vs. Negative    | 2.25                | 0.285, 17.759 | 0.442 | 1.613                 | 0.152, 17.121  | 0.692 |
| <b>Perineural Invasion</b><br>Yes vs. No   | 8                   | 0.531, 20.649 | 0.133 | 5.965                 | 0.291, 122.121 | 0.246 |
| <b>Perivascular Invasion</b><br>Yes vs. No | 2                   | 0.174, 22.949 | 0.578 | 1.605                 | 0.086, 29.784  | 0.751 |

**Table S6 Univariate and multivariate analysis of correlation between the density of B cells and OS < 3 yr in ICC**

| ICC                                     | Univariate Analysis |               |       | Multivariate Analysis |                |       |
|-----------------------------------------|---------------------|---------------|-------|-----------------------|----------------|-------|
|                                         | Odds Ratio          | 95% CI        | p     | Odds Ratio            | 95% CI         | p     |
| <b>B cells:</b><br>High vs. Low         | 0.135               | 0.032, 0.562  | 0.006 | 0.012                 | 0.001, 0.25    | 0.004 |
| <b>Tumor grade: Moderate vs. Poor</b>   | 2.758               | 0.572, 13.293 | 0.206 | 26.955                | 1.491, 487.445 | 0.026 |
| <b>Tumor grade: Well vs. Poor</b>       | 0.583               | 0.044, 7.661  | 0.682 | 0.204                 | 0.001, 34.224  | 0.543 |
| <b>pT2 vs. T1</b>                       | 2.722               | 0.616, 12.039 | 0.187 | 0.893                 | 0.064, 12.477  | 0.933 |
| <b>pT3 vs. T1</b>                       | 0.519               | 0.046, 5.791  | 0.594 | 0.05                  | 0, 30.044      | 0.359 |
| <b>N1 vs. N0</b>                        | 1.667               | 0.367, 7.566  | 0.508 | 10.266                | 0.18, 585.86   | 0.259 |
| <b>Margin:</b><br>Positive vs. Negative | 3.273               | 0.677, 15.823 | 0.14  | 11.144                | 0.555, 23.764  | 0.115 |

**Table S7 Univariate and multivariate analysis of correlation between the density of CD4+ T cells and OS < 3 yr in DCC**

| DCC                                     | Univariate Analysis |                |       | Multivariate Analysis |                |       |
|-----------------------------------------|---------------------|----------------|-------|-----------------------|----------------|-------|
|                                         | Odds Ratio          | 95% CI         | p     | Odds Ratio            | 95% CI         | p     |
| <b>CD4+ T cells:</b><br>High vs. Low    | 17.5                | 1.989, 153.938 | 0.01  | 19.003                | 2.078, 173.825 | 0.009 |
| <b>N1 vs. N0</b>                        | 1.339               | 0.279, 6.434   | 0.715 | 1.282                 | 0.19, 8.648    | 0.799 |
| <b>Margin:</b><br>Positive vs. Negative | 1.212               | 0.212, 6.935   | 0.829 | 1.958                 | 0.266, 14.4    | 0.509 |

**Table S8 Univariate and multivariate analysis of correlation between the density of CD4+ T cells and OS < 3 yr in HC**

| HC                                                   | Univariate Analysis |               |       | Multivariate Analysis |               |       |
|------------------------------------------------------|---------------------|---------------|-------|-----------------------|---------------|-------|
|                                                      | Odds Ratio          | 95% CI        | p     | Odds Ratio            | 95% CI        | p     |
| <b>CD4+ T cells:</b><br>High vs. Low                 | 6                   | 0.532, 67.64  | 0.147 | 4.654                 | 0.262, 82.587 | 0.295 |
| <b>N1 vs. N0</b>                                     | 1.455               | 0.123, 17.233 | 0.766 | 1.662                 | 0.083, 33.15  | 0.739 |
| <b>Margin:</b><br>Positive vs. Negative              | 2.25                | 0.285, 17.759 | 0.442 | 1.406                 | 0.134, 14.794 | 0.776 |
| <b>Perineural Invasion</b><br>Yes vs. No             | 8                   | 0.53, 120.649 | 0.133 | 2.975                 | 0.111, 80.096 | 0.516 |
| <b>Perivascular</b><br><b>Invasion</b><br>Yes vs. No | 2                   | 0.174, 22.949 | 0.578 |                       |               |       |

**Table S9 Univariate and multivariate analysis of correlation between the density of CD4+ T cells and OS < 3 yr in ICC**

| ICC                                      | Univariate Analysis |               |       | Multivariate Analysis |               |       |
|------------------------------------------|---------------------|---------------|-------|-----------------------|---------------|-------|
|                                          | Odds Ratio          | 95% CI        | p     | Odds Ratio            | 95% CI        | p     |
| <b>CD4+ T cells:</b><br>High vs. Low     | 1.857               | 0.522, 6.612  | 0.339 | 1.664                 | 0.314, 8.826  | 0.55  |
| <b>Tumor grade: Moderate</b><br>vs. Poor | 2.758               | 0.572, 13.293 | 0.206 | 3.253                 | 0.436, 24.291 | 0.25  |
| <b>Tumor grade: Well vs.</b><br>Poor     | 0.583               | 0.044, 7.661  | 0.682 | 0.237                 | 0.008, 7.026  | 0.405 |
| <b>pT2 vs. T1</b>                        | 2.722               | 0.616, 12.039 | 0.187 | 1.052                 | 0.146, 7.583  | 0.96  |
| <b>pT3 vs. T1</b>                        | 0.519               | 0.046, 5.791  | 0.594 | 0.096                 | 0.002, 5.093  | 0.248 |
| <b>N1 vs. N0</b>                         | 1.667               | 0.367, 7.566  | 0.508 | 4.112                 | 0.219, 77.39  | 0.345 |
| <b>Margin:</b><br>Positive vs. Negative  | 3.273               | 0.677, 15.823 | 0.14  | 2.678                 | 0.347, 20.692 | 0.345 |

**Table S10 Univariate and multivariate analysis of correlation between the density of CD8+ T cells and OS < 3 yr in DCC**

| DCC                                     | Univariate Analysis |             |       | Multivariate Analysis |             |       |
|-----------------------------------------|---------------------|-------------|-------|-----------------------|-------------|-------|
|                                         | Odds Ratio          | 95% CI      | p     | Odds Ratio            | 95% CI      | p     |
| <b>CD8+ T cells:</b><br>High vs. Low    | 0.276               | 0.062,1.233 | 0.092 | 0.238                 | 0.049,1.158 | 0.075 |
| <b>N1 vs. N0</b>                        | 1.339               | 0.279,6.434 | 0.715 | 1.141                 | 0.218,5.988 | 0.876 |
| <b>Margin:</b><br>Positive vs. Negative | 1.212               | 0.212,6.935 | 0.829 | 0.65                  | 0.093,4.53  | 0.663 |

**Table S11 Univariate and multivariate analysis of correlation between the density of CD8+ T cells and OS < 3 yr in HC**

| HC                                         | Univariate Analysis |              |       | Multivariate Analysis |              |       |
|--------------------------------------------|---------------------|--------------|-------|-----------------------|--------------|-------|
|                                            | Odds Ratio          | 95% CI       | p     | Odds Ratio            | 95% CI       | P     |
| <b>CD8+ T cells:</b><br>High vs. Low       | 0.167               | 0.532,67.64  | 0.147 | 0.181                 | 0.015,2.24   | 0.183 |
| <b>N1 vs. N0</b>                           | 1.455               | 0.123,17.233 | 0.766 | 0.843                 | 0.048,14.818 | 0.907 |
| <b>Margin:</b><br>Positive vs. Negative    | 2.25                | 0.285,17.759 | 0.442 | 1.616                 | 0.161,16.271 | 0.684 |
| <b>Perineural Invasion</b><br>Yes vs. No   | 8                   | 0.53,120.649 | 0.133 |                       |              |       |
| <b>Perivascular Invasion</b><br>Yes vs. No | 2                   | 0.174,22.949 | 0.578 | 2.415                 | 0.15,38.894  | 0.534 |

**Table S12 Univariate and multivariate analysis of correlation between the density of CD8+ T cells and OS < 3 yr in ICC**

| ICC                                     | Univariate Analysis |              |       | Multivariate Analysis |              |       |
|-----------------------------------------|---------------------|--------------|-------|-----------------------|--------------|-------|
|                                         | Odds Ratio          | 95% CI       | p     | Odds Ratio            | 95% CI       | p     |
| <b>CD8+ T cells:</b><br>High vs. Low    | 0.222               | 0.058, 0.858 | 0.029 | 0.218                 | 0.038, 1.247 | 0.087 |
| <b>Tumor grade: Moderate vs. Poor</b>   | 2.758               | 0.572,13.293 | 0.206 | 5.665                 | 0.749,42.864 | 0.093 |
| <b>Tumor grade: Well vs. Poor</b>       | 0.583               | 0.044,7.661  | 0.682 | 0.31                  | 0.009,11.178 | 0.522 |
| <b>pT2 vs. T1</b>                       | 2.722               | 0.616,12.039 | 0.187 | 0.73                  | 0.095,5.586  | 0.762 |
| <b>pT3 vs. T1</b>                       | 0.519               | 0.046,5.791  | 0.594 | 0.105                 | 0.002,4.949  | 0.252 |
| <b>N1 vs. N0</b>                        | 1.667               | 0.367,7.566  | 0.508 | 3.969                 | 0.238,66.318 | 0.337 |
| <b>Margin:</b><br>Positive vs. Negative | 3.273               | 0.677,15.823 | 0.14  | 2.783                 | 0.321,24.103 | 0.353 |

**Table S13 Univariate and multivariate analysis of correlation between the density of CD8+ Granzyme B+ T cells and OS < 3 yr in DCC**

| DCC                                              | Univariate Analysis |              |       | Multivariate Analysis |              |       |
|--------------------------------------------------|---------------------|--------------|-------|-----------------------|--------------|-------|
|                                                  | Odds Ratio          | 95% CI       | p     | Odds Ratio            | 95% CI       | p     |
| <b>CD8+ Granzyme B+ T cells:</b><br>High vs. Low | 0.144               | 0.027, 0.778 | 0.024 | 0.114                 | 0.018, 0.705 | 0.02  |
| <b>N1 vs. N0</b>                                 | 1.339               | 0.279, 6.434 | 0.715 | 1.049                 | 0.185, 5.94  | 0.957 |
| <b>Margin:</b><br>Positive vs. Negative          | 1.212               | 0.212, 6.935 | 0.829 | 0.494                 | 0.06, 4.051  | 0.511 |

**Table S14 Univariate and multivariate analysis of correlation between the density of CD8+ Granzyme B + T cells and OS < 3 yr in HC**

| HC                                               | Univariate Analysis |               |       | Multivariate Analysis |               |       |
|--------------------------------------------------|---------------------|---------------|-------|-----------------------|---------------|-------|
|                                                  | Odds Ratio          | 95% CI        | p     | Odds Ratio            | 95% CI        | P     |
| <b>CD8+ Granzyme B+ T cells:</b><br>High vs. Low | 0.583               | 0.075, 4.562  | 0.608 | 0.287                 | 0.017, 4.835  | 0.386 |
| <b>N1 vs. N0</b>                                 | 1.455               | 0.123, 17.233 | 0.766 | 0.596                 | 0.022, 15.854 | 0.757 |
| <b>Margin:</b><br>Positive vs. Negative          | 2.25                | 0.285, 17.759 | 0.442 | 1.97                  | 0.142, 27.319 | 0.613 |
| <b>Perineural Invasion</b><br>Yes vs. No         | 8                   | 0.53, 120.649 | 0.133 | 11.721                | 0.408, 336.42 | 0.151 |
| <b>Perivascular Invasion</b><br>Yes vs. No       | 2                   | 0.174, 22.949 | 0.578 | 1.203                 | 0.056, 26.038 | 0.906 |

**Table S15 Univariate and multivariate analysis of correlation between the density of CD8+ Granzyme B + T cells and OS < 3 yr in ICC**

| ICC                                              | Univariate Analysis |               |       | Multivariate Analysis |                |       |
|--------------------------------------------------|---------------------|---------------|-------|-----------------------|----------------|-------|
|                                                  | Odds Ratio          | 95% CI        | p     | Odds Ratio            | 95% CI         | P     |
| <b>CD8+ Granzyme B+ T cells:</b><br>High vs. low | 0.222               | 0.058, 0.858  | 0.029 | 0.269                 | 0.05, 1.435    | 0.124 |
| <b>Tumor grade:</b><br>Moderate vs. Poor         | 2.758               | 0.572, 13.293 | 0.206 | 5.377                 | 0.693, 41.733  | 0.108 |
| <b>Well vs. Poor</b>                             | 0.583               | 0.044, 7.661  | 0.682 | 0.381                 | 0.011, 13.593  | 0.597 |
| <b>pT2 vs. T1</b>                                | 2.722               | 0.616, 12.039 | 0.187 | 0.72                  | 0.083, 6.253   | 0.766 |
| <b>pT3 vs. T1</b>                                | 0.519               | 0.046, 5.791  | 0.594 | 0.041                 | 0, 3.94        | 0.171 |
| <b>N1 vs. N0</b>                                 | 1.667               | 0.367, 7.566  | 0.508 | 7.283                 | 0.285, 186.205 | 0.23  |
| <b>Margin:</b><br>Positive vs. Negative          | 3.273               | 0.677, 15.823 | 0.14  | 2.268                 | 0.272, 18.896  | 0.449 |

**Table S16 Univariate and multivariate analysis of correlation between the density of CD8+EOMES-PD-1- T cells and OS < 3 yr in DCC**

| DCC                                             | Univariate Analysis |             |       | Multivariate Analysis |             |       |
|-------------------------------------------------|---------------------|-------------|-------|-----------------------|-------------|-------|
|                                                 | Odds Ratio          | 95% CI      | p     | Odds Ratio            | 95% CI      | p     |
| <b>CD8+EOMES-PD-1- T cells:</b><br>High vs. Low | 0.476               | 0.117,1.944 | 0.301 | 0.501                 | 0.122,2.062 | 0.338 |
| <b>N1 vs. N0</b>                                | 1.339               | 0.279,6.434 | 0.715 | 1.363                 | 0.276,6.736 | 0.704 |
| <b>Margin:</b><br>Positive vs. Negative         | 1.212               | 0.212,6.935 | 0.829 | 0.994                 | 0.163,6.052 | 0.995 |

**Table S17 Univariate and multivariate analysis of correlation between the density of CD8+EOMES-PD-1- T cells and OS < 3 yr in HC**

| HC                                               | Univariate Analysis |              |       | Multivariate Analysis |             |       |
|--------------------------------------------------|---------------------|--------------|-------|-----------------------|-------------|-------|
|                                                  | Odds Ratio          | 95% CI       | p     | Odds Ratio            | 95 CI       | P     |
| <b>CD8+ EOMES-PD-1- T cells:</b><br>High vs. Low | 0                   | 0, Infinite  | 0.995 | 0                     | 0,Inf       | 0.996 |
| <b>N1 vs. N0</b>                                 | 1.455               | 0.123,17.233 | 0.766 | 0                     | 0,Inf       | 0.998 |
| <b>Margin:</b><br>Positive vs. Negative          | 2.25                | 0.285,17.759 | 0.442 | 0.751                 | 0.02,28.261 | 0.877 |
| <b>Perineural Invasion</b><br>Yes vs. No         | 8                   | 0.53,120.649 | 0.133 | 1207613<br>695.628    | 0, Infinite | 0.998 |
| <b>Perivascular Invasion</b><br>Yes vs. No       | 2                   | 0.174,22.949 | 0.578 | 0.751                 | 0.02,28.261 | 0.877 |

**Table S18 Univariate and multivariate analysis of correlation between the density of CD8+EOMES+PD-1+ T cells and OS < 3 yr in ICC**

| ICC                                              | Univariate Analysis |              |       | Multivariate Analysis |                |       |
|--------------------------------------------------|---------------------|--------------|-------|-----------------------|----------------|-------|
|                                                  | Odds Ratio          | 95% CI       | p     | Odds Ratio            | 95% CI         | P     |
| <b>CD8+ EOMES-PD-1- T cells:</b><br>High vs. Low | 0.076               | 0.016,0.358  | 0.001 | 0.049                 | 0.006, 0.433   | 0.007 |
| <b>N1 vs. N0</b>                                 | 2.758               | 0.572,13.293 | 0.206 | 7.673                 | 0.791,74.398   | 0.079 |
| <b>Margin:</b><br>Positive vs. Negative          | 0.583               | 0.044,7.661  | 0.682 | 0.32                  | 0.004,26.69    | 0.614 |
| <b>Perineural Invasion</b><br>Yes vs. No         | 2.722               | 0.616,12.039 | 0.187 | 0.343                 | 0.029,4.123    | 0.399 |
| <b>Perivascular Invasion</b><br>Yes vs. No       | 0.519               | 0.046,5.791  | 0.594 | 0.03                  | 0,6.23         | 0.197 |
| <b>N1</b>                                        | 1.667               | 0.367,7.566  | 0.508 | 20.544                | 0.421,1002.329 | 0.128 |
| <b>Margin:</b><br>Positive vs. Negative          | 3.273               | 0.677,15.823 | 0.14  | 3.013                 | 0.253,35.906   | 0.383 |

**Table S19 Univariate and multivariate analysis of correlation between the density of PD-L1+ CSF-1R+ TAM and OS < 3 yr in DCC**

| DCC                                        | Univariate Analysis |              |       | Multivariate Analysis |              |       |
|--------------------------------------------|---------------------|--------------|-------|-----------------------|--------------|-------|
|                                            | Odds Ratio          | 95% CI       | p     | Odds Ratio            | 95% CI       | p     |
| <b>PD-L1+ CSF-1R+ TAM:</b><br>High vs. Low | 6.923               | 1.285,37.287 | 0.024 | 8.173                 | 1.402,47.635 | 0.019 |
| <b>N1 vs. N0</b>                           | 1.339               | 0.279,6.434  | 0.715 | 1.323                 | 0.235,7.463  | 0.751 |
| <b>Margin:</b><br>Positive vs. Negative    | 1.212               | 0.212,6.935  | 0.829 | 2.208                 | 0.326,14.96  | 0.417 |

**Table S20 Univariate and multivariate analysis of correlation between the density of PD-L1+ CSF-1R+ TAM and OS < 3 yr in HC**

| HC                                         | Univariate Analysis |              |       | Multivariate Analysis |               |       |
|--------------------------------------------|---------------------|--------------|-------|-----------------------|---------------|-------|
|                                            | Odds Ratio          | 95% CI       | p     | Odds Ratio            | 95% CI        | P     |
| <b>PD-L1+ CSF-1R+ TAM:</b><br>High vs. Low | 1.714               | 0.219,13.406 | 0.608 | 5.583                 | 0.261,119.634 | 0.271 |
| <b>N1 vs. N0</b>                           | 1.455               | 0.123,17.233 | 0.766 | 0.705                 | 0.03,16.394   | 0.828 |
| <b>Margin:</b><br>Positive vs. Negative    | 2.25                | 0.285,17.759 | 0.442 | 3.21                  | 0.173,59.688  | 0.434 |
| <b>Perineural Invasion</b><br>Yes vs. No   | 8                   | 0.53,120.649 | 0.133 | 8.501                 | 0.378,191.157 | 0.178 |
| <b>Perivascular Invasion</b><br>Yes vs. No | 2                   | 0.174,22.949 | 0.578 | 2.848                 | 0.101,80.21   | 0.539 |

**Table S21 Univariate and multivariate analysis of correlation between the density of PD-L1+ CSF-1R+ TAM and OS < 3 yr in ICC**

| ICC                                        | Univariate Analysis |              |       | Multivariate Analysis |              |       |
|--------------------------------------------|---------------------|--------------|-------|-----------------------|--------------|-------|
|                                            | Odds Ratio          | 95% CI       | p     | Odds Ratio            | 95% CI       | P     |
| <b>PD-L1+ CSF-1R+ TAM:</b><br>High vs. Low | 7.429               | 1.778,31.04  | 0.006 | 10.152                | 1.658,62.177 | 0.012 |
| <b>Tumor grade: Moderate vs. Poor</b>      | 2.758               | 0.572,13.293 | 0.206 | 2.818                 | 0.34,23.374  | 0.337 |
| <b>Well vs. Poor</b>                       | 0.583               | 0.044,7.661  | 0.682 | 0.142                 | 0.003,6.886  | 0.324 |
| <b>pT2 vs. T1</b>                          | 2.722               | 0.616,12.039 | 0.187 | 1.22                  | 0.123,12.055 | 0.865 |
| <b>pT3 vs. T1</b>                          | 0.519               | 0.046,5.791  | 0.594 | 0.081                 | 0.001,7.667  | 0.279 |
| <b>N1 vs. N0</b>                           | 1.667               | 0.367,7.566  | 0.508 | 3.09                  | 0.111,85.791 | 0.506 |
| <b>Margin:</b><br>Positive vs. Negative    | 3.273               | 0.677,15.823 | 0.14  | 2.568                 | 0.248,26.578 | 0.429 |



**Table S22 Univariate and multivariate analysis of correlation between the density of M1 TAM and OS<3 yr in DCC**

| DCC                                      | Univariate Analysis |             |       | Multivariate Analysis |             |       |
|------------------------------------------|---------------------|-------------|-------|-----------------------|-------------|-------|
|                                          | Odds Ratio          | 95% CI      | p     | Odds Ratio            | 95% CI      | p     |
| <b>M1 TAM:<br/>High vs. Low</b>          | 0.476               | 0.117,1.944 | 0.301 | 0.449                 | 0.105,1.927 | 0.281 |
| <b>N1 vs. N0</b>                         | 1.339               | 0.279,6.434 | 0.715 | 1.095                 | 0.213,5.628 | 0.913 |
| <b>Margin:<br/>Positive vs. Negative</b> | 1.212               | 0.212,6.935 | 0.829 | 0.917                 | 0.149,5.646 | 0.926 |

**Table S23 Univariate and multivariate analysis of correlation between the density of M1 TAM and OS < 3 yr in HC**

| HC                                          | Univariate Analysis |              |       | Multivariate Analysis |              |       |
|---------------------------------------------|---------------------|--------------|-------|-----------------------|--------------|-------|
|                                             | Odds Ratio          | 95% CI       | p     | Odds Ratio            | 95% CI       | P     |
| <b>M1 TAM:<br/>High vs. Low</b>             | 0.583               | 0.075,4.562  | 0.608 | 0.527                 | 0.062,4.449  | 0.556 |
| <b>N1 vs. N0</b>                            | 1.455               | 0.123,17.233 | 0.766 | 1.015                 | 0.063,16.363 | 0.992 |
| <b>Margin:<br/>Positive vs. Negative</b>    | 2.25                | 0.285,17.759 | 0.442 | 2.538                 | 0.285,22.592 | 0.404 |
| <b>Perineural Invasion<br/>Yes vs. No</b>   | 8                   | 0.53,120.649 | 0.133 |                       |              |       |
| <b>Perivascular Invasion<br/>Yes vs. No</b> | 2                   | 0.174,22.949 | 0.578 | 2.14                  | 0.142,32.208 | 0.582 |

**Table S24 Univariate and multivariate analysis of correlation between the density of M1 TAM and OS < 3 yr in ICC**

| ICC                                       | Univariate Analysis |              |       | Multivariate Analysis |               |       |
|-------------------------------------------|---------------------|--------------|-------|-----------------------|---------------|-------|
|                                           | Odds Ratio          | 95% CI       | p     | Odds Ratio            | 95% CI        | P     |
| <b>M1 TAM:<br/>High vs. Low</b>           | 0.222               | 0.058,0.858  | 0.029 | 0.208                 | 0.039,1.104   | 0.065 |
| <b>Tumor grade:<br/>Moderate vs. Poor</b> | 2.758               | 0.572,13.293 | 0.206 | 5.432                 | 0.66,44.682   | 0.115 |
| <b>Well vs. Poor</b>                      | 0.583               | 0.044,7.661  | 0.682 | 0.304                 | 0.01,8.9      | 0.49  |
| <b>pT2 vs. T1</b>                         | 2.722               | 0.616,12.039 | 0.187 | 0.793                 | 0.089,7.036   | 0.835 |
| <b>pT3 vs. T1</b>                         | 0.519               | 0.046,5.791  | 0.594 | 0.044                 | 0,4.674       | 0.189 |
| <b>N1 vs. N0</b>                          | 1.667               | 0.367,7.566  | 0.508 | 5.724                 | 0.206,158.813 | 0.303 |
| <b>Margin:<br/>Positive vs. Negative</b>  | 3.273               | 0.677,15.823 | 0.14  | 2.482                 | 0.295,20.894  | 0.403 |

**Table S25 Univariate and multivariate analysis of correlation between the density of PD-L1+ M1 TAM and OS < 3 yr in DCC**

| DCC                                     | Univariate Analysis |              |       | Multivariate Analysis |              |       |
|-----------------------------------------|---------------------|--------------|-------|-----------------------|--------------|-------|
|                                         | Odds Ratio          | 95% CI       | p     | Odds Ratio            | 95% CI       | p     |
| <b>PD-L1+ M1 TAM:</b><br>High vs. Low   | 6.923               | 1.285,37.287 | 0.024 | 7.07                  | 1.303,38.349 | 0.023 |
| <b>N1 vs. N0</b>                        | 1.339               | 0.279,6.434  | 0.365 |                       |              |       |
| <b>Margin:</b><br>Positive vs. Negative | 1.212               | 0.212,6.935  | 0.829 | 1.423                 | 0.221,9.15   | 0.71  |

**Table S26 Univariate and multivariate analysis of correlation between the density of PD-L1+ M1 TAM and OS < 3 yr in HC**

| HC                                         | Univariate Analysis |              |       | Multivariate Analysis |               |       |
|--------------------------------------------|---------------------|--------------|-------|-----------------------|---------------|-------|
|                                            | Odds Ratio          | 95% CI       | p     | Odds Ratio            | 95% CI        | P     |
| <b>PD-L1+ M1 TAM:</b><br>High vs. Low      | 1.714               | 0.219,13.406 | 0.608 | 0.665                 | 0.041,10.784  | 0.774 |
| <b>N1 vs. N0</b>                           | 1.455               | 0.123,17.233 | 0.766 | 0.738                 | 0.037,14.815  | 0.843 |
| <b>Margin:</b><br>Positive vs. Negative    | 2.25                | 0.285,17.759 | 0.442 | 1.545                 | 0.15,15.946   | 0.715 |
| <b>Perineural Invasion</b><br>Yes vs. No   | 8                   | 0.53,120.649 | 0.133 | 9.074                 | 0.247,333.173 | 0.23  |
| <b>Perivascular Invasion</b><br>Yes vs. No | 2                   | 0.174,22.949 | 0.578 | 1.543                 | 0.086,27.63   | 0.768 |

**Table S27 Univariate and multivariate analysis of correlation between the density of PD-L1+ M1 TAM and OS < 3 yr in ICC**

| ICC                                      | Univariate Analysis |              |       | Multivariate Analysis |               |       |
|------------------------------------------|---------------------|--------------|-------|-----------------------|---------------|-------|
|                                          | Odds Ratio          | 95% CI       | p     | Odds Ratio            | 95% CI        | P     |
| <b>PD-L1+ M1 TAM:</b><br>High vs. Low    | 2.852               | 0.777,10.467 | 0.114 | 6.166                 | 0.875,43.46   | 0.068 |
| <b>Tumor grade:</b><br>Moderate vs. Poor | 2.758               | 0.572,13.293 | 0.206 | 3.143                 | 0.432,22.868  | 0.258 |
| <b>Well vs. Poor</b>                     | 0.583               | 0.044,7.661  | 0.682 | 0.162                 | 0.003,8.648   | 0.369 |
| <b>pT2 vs. T1</b>                        | 2.722               | 0.616,12.039 | 0.187 | 1.86                  | 0.213,16.217  | 0.574 |
| <b>pT3 vs. T1</b>                        | 0.519               | 0.046,5.791  | 0.594 | 0.086                 | 0.002,4.201   | 0.216 |
| <b>N1 vs. N0</b>                         | 1.667               | 0.367,7.566  | 0.508 | 9.247                 | 0.523,163.547 | 0.129 |
| <b>Margin:</b><br>Positive vs. Negative  | 3.273               | 0.677,15.823 | 0.14  | 2.321                 | 0.288,18.706  | 0.429 |

**Table S28 Univariate and multivariate analysis of correlation between the density of M2 TAM and OS < 3 yr in DCC**

| DCC                                     | Univariate Analysis |              |       | Multivariate Analysis |              |       |
|-----------------------------------------|---------------------|--------------|-------|-----------------------|--------------|-------|
|                                         | Odds Ratio          | 95% CI       | p     | Odds Ratio            | 95% CI       | p     |
| <b>M2 TAM:</b><br>High vs. Low          | 6.923               | 1.285,37.287 | 0.024 | 7.473                 | 1.365,40.907 | 0.02  |
| <b>N1 vs. N0</b>                        | 1.339               | 0.279,6.434  | 0.715 | 1.045                 | 0.19,5.745   | 0.96  |
| <b>Margin:</b><br>Positive vs. Negative | 1.212               | 0.212,6.935  | 0.829 | 1.072                 | 0.157,7.329  | 0.943 |

**Table S29 Univariate and multivariate analysis of correlation between the density of M2 TAM cells and OS < 3 yr in HC**

| HC                                         | Univariate Analysis |              |       | Multivariate Analysis |               |       |
|--------------------------------------------|---------------------|--------------|-------|-----------------------|---------------|-------|
|                                            | Odds Ratio          | 95% CI       | p     | Odds Ratio            | 95 CI         | P     |
| <b>M2 TAM:</b><br>High vs. Low             | 6                   | 0.532,67.64  | 0.147 | 5.194                 | 0.213,126.625 | 0.312 |
| <b>N1 vs. N0</b>                           | 1.455               | 0.123,17.233 | 0.766 | 1.457                 | 0.05,42.864   | 0.827 |
| <b>Margin:</b><br>Positive vs. Negative    | 2.25                | 0.285,17.759 | 0.442 | 0.877                 | 0.055,13.911  | 0.926 |
| <b>Perineural Invasion</b><br>Yes vs. No   | 8                   | 0.53,120.649 | 0.133 | 2.563                 | 0.083,79.058  | 0.591 |
| <b>Perivascular Invasion</b><br>Yes vs. No | 2                   | 0.174,22.949 | 0.578 | 1.753                 | 0.092,33.309  | 0.709 |

**Table S30 Univariate and multivariate analysis of correlation between the density of M2 TAM and OS < 3 yr in ICC**

| ICC                                      | Univariate Analysis |              |       | Multivariate Analysis |              |       |
|------------------------------------------|---------------------|--------------|-------|-----------------------|--------------|-------|
|                                          | Odds Ratio          | 95% CI       | p     | Odds Ratio            | 95% CI       | P     |
| <b>M2 TAM:</b><br>High vs. Low           | 1.227               | 0.35,4.307   | 0.749 | 2.35                  | 0.467,11.831 | 0.3   |
| <b>Tumor grade:</b><br>Moderate vs. Poor | 2.758               | 0.572,13.293 | 0.206 | 4.151                 | 0.603,28.584 | 0.148 |
| <b>Well vs. Poor</b>                     | 0.583               | 0.044,7.661  | 0.682 | 0.192                 | 0.006,6.056  | 0.349 |
| <b>pT2 vs. T1</b>                        | 2.722               | 0.616,12.039 | 0.187 | 1.479                 | 0.214,10.216 | 0.691 |
| <b>pT3 vs. T1</b>                        | 0.519               | 0.046,5.791  | 0.594 | 0.078                 | 0.001,4.671  | 0.222 |
| <b>N1 vs. N0</b>                         | 1.771               | 0.392,8.002  | 0.458 | 6.411                 | 0.331,124.16 | 0.219 |
| <b>Margin:</b><br>Positive vs. Negative  | 3.273               | 0.677,15.823 | 0.14  | 1.455                 | 0.238,8.91   | 0.685 |

**Table S31 Univariate and multivariate analysis of correlation between the density of PD-L1+ M2 TAM and OS < 3 yr in DCC**

| DCC                                     | Univariate Analysis |             |       | Multivariate Analysis |             |       |
|-----------------------------------------|---------------------|-------------|-------|-----------------------|-------------|-------|
|                                         | Odds Ratio          | 95% CI      | p     | Odds Ratio            | 95% CI      | p     |
| <b>PD-L1+ M2 TAM:</b><br>High vs. Low   | 314366015.311       | 0,Inf       | 0.993 | 314366015.306         | 0,Inf       | 0.993 |
| <b>N1 vs. N0</b>                        | 1.339               | 0.279,6.434 | 0.715 | 1                     | 0.153,6.534 | 1     |
| <b>Margin:</b><br>Positive vs. Negative | 1.212               | 0.212,6.935 | 0.829 | 1                     | 0.114,8.736 | 1     |

**Table S32 Univariate and multivariate analysis of correlation between the density of PD-L1+ M2 TAM and OS < 3 yr in HC**

| HC                                         | Univariate Analysis |              |       | Multivariate Analysis |               |       |
|--------------------------------------------|---------------------|--------------|-------|-----------------------|---------------|-------|
|                                            | Odds Ratio          | 95% CI       | p     | Odds Ratio            | 95% CI        | P     |
| <b>PD-L1+ M2 TAM:</b><br>High vs. Low      | 0.583               | 0.075,4.562  | 0.608 | 0.244                 | 0.012,5.12    | 0.364 |
| <b>N1 vs. N0</b>                           | 1.455               | 0.123,17.233 | 0.766 | 0.371                 | 0.011,12.772  | 0.583 |
| <b>Margin:</b><br>Positive vs. Negative    | 2.25                | 0.285,17.759 | 0.442 | 1.3                   | 0.116,14.542  | 0.831 |
| <b>Perineural Invasion</b><br>Yes vs. No   | 8                   | 0.53,120.649 | 0.133 | 13.39                 | 0.366,489.914 | 0.158 |
| <b>Perivascular Invasion</b><br>Yes vs. No | 2                   | 0.174,22.949 | 0.578 | 2.002                 | 0.088,45.646  | 0.664 |

**Table S33 Univariate and multivariate analysis of correlation between the density of PD-L1+ M2 TAM cells and OS < 3 yr in ICC**

| ICC                                      | Univariate Analysis |              |       | Multivariate Analysis |               |       |
|------------------------------------------|---------------------|--------------|-------|-----------------------|---------------|-------|
|                                          | Odds Ratio          | 95% CI       | p     | Odds Ratio            | 95% CI        | P     |
| <b>PD-L1+ M2 TAM:</b><br>High vs. Low    | 7.429               | 1.778,31.04  | 0.006 | 10.812                | 1.63,71.735   | 0.014 |
| <b>Tumor grade:</b><br>Moderate vs. Poor | 2.758               | 0.572,13.293 | 0.206 | 2.694                 | 0.318,22.862  | 0.364 |
| <b>Well vs. Poor</b>                     | 0.583               | 0.044,7.661  | 0.682 | 0.167                 | 0.002,12.118  | 0.413 |
| <b>pT2 vs. T1</b>                        | 2.722               | 0.616,12.039 | 0.187 | 0.884                 | 0.101,7.741   | 0.912 |
| <b>pT3 vs. T1</b>                        | 0.519               | 0.046,5.791  | 0.594 | 0.057                 | 0.001,6.325   | 0.233 |
| <b>N1 vs. N0</b>                         | 1.667               | 0.367,7.566  | 0.508 | 13.68                 | 0.419,447.119 | 0.141 |
| <b>Margin:</b><br>Positive vs. Negative  | 3.273               | 0.677,15.823 | 0.14  | 2.007                 | 0.213,18.946  | 0.543 |
